# Supplementary material for: Fibromyalgia and Chronic Fatigue Syndromes: A systematic review and meta-analysis of cardiorespiratory fitness and neuromuscular function compared with healthy individuals
Source: PubMed Central journal article supplement (PMC9584387; doi:10.1371/journal.pone.0276009), 2022-10-20
Supplement: pone.0276009.s002.pdf [file pone.0276009.s002.pdf]

Table 2. Study characteristics for the CPET studies included in the Systematic Review and Meta-analysis for chronic fatigue syndrome.

| Year | Name       | Type | Diagn.        | test | type | Testing protocol                                                                                                                                                                                                                                                                                                                                                        | RPE          | HR   | AT  | Lactate |
|------|------------|------|---------------|------|------|-------------------------------------------------------------------------------------------------------------------------------------------------------------------------------------------------------------------------------------------------------------------------------------------------------------------------------------------------------------------------|--------------|------|-----|---------|
| 2015 | Aerenhouts | CFS  | CDC           | VE   | C    | Cycling, test started at 60w with 30w increased every minute until exhaustion or participant pedalling rate sunk below 55rpm                                                                                                                                                                                                                                            |              |      |     |         |
| 2001 | Bazelmans  | CFS  | CDC           | VE   | C    | Cycling: Workload was increased every minute in step of 10% of estimated maximal workload, from 10 to 30%                                                                                                                                                                                                                                                               | At 3min      | Peak |     |         |
| 1998 | Blackwood  | CFS  | Not specified | VE   | T    | Treadmill: Standardize Bruce Protocol                                                                                                                                                                                                                                                                                                                                   | At 85% HRmax |      |     |         |
| 2019 | Bouquet    | CFS  | Canadian 2003 | VE   | C    | Cycling: Workload was increased 15 watts per minute until volitional fatigue.                                                                                                                                                                                                                                                                                           |              | Peak | VT  |         |
| 2003 | Cook       | CFS  | CDC           | M    | T    | Treadmill: exercise stage was 3 min, and the exercise test began at 67 m·min <sup>-1</sup> and no incline. For stage 2 of exercise, the treadmill speed was increased to 94 m·min <sup>-1</sup> . For the remaining stages, speed was kept constant, and intensity was increased by raising the incline of the treadmill by 2% at each stage until the end of the test. | At GET       | Peak | GET |         |
| 2006 | Cook       | CFS  | CDC           | M    | C    | Cycling: increased by 5W every 20 seconds                                                                                                                                                                                                                                                                                                                               | mean         | Peak |     |         |
| 2012 | Cook       | CFS  | CDC           | S    | C    | Cycling: Constant Intensity at 40% VO <sub>2</sub> peak for 20minutes                                                                                                                                                                                                                                                                                                   | mean         | Mean |     |         |
| 2022 | Cook       | CFS  | Not known     | VE   | C    | 3min unloaded warm-up. Exercise testing from 0 Watts with linear increases of 5 Watts every 20 seconds (15 Watts/min) until volitional exhaustion at 60-70rpm.                                                                                                                                                                                                          | Mean         | Peak |     | Peak    |
| 2000 | De Becker  | CFS  | CDC           | S/M  | C    | Cycling: starting at 10w and increasing 10w each minute                                                                                                                                                                                                                                                                                                                 |              | Peak |     |         |
| 2002 | Farquhar   | CFS  | CDC           | VE   | C    | Cycling: 2 min stages, workload increase of 25-30watts                                                                                                                                                                                                                                                                                                                  |              | Peak |     |         |
| 2000 | Fulcher    | CFS  | Oxford        | VE   | T    | Treadmill: 5kph with 2.5% of gradient increase every 2minutes                                                                                                                                                                                                                                                                                                           |              | Peak |     |         |

|      |                 |     |                  |      |     |                                                                                                                                                                                                            |        |      |                    |
|------|-----------------|-----|------------------|------|-----|------------------------------------------------------------------------------------------------------------------------------------------------------------------------------------------------------------|--------|------|--------------------|
| 2005 | Gallagher       | CFS | Oxford           | VE   | T   | Treadmill: 5kph with 2.5% of gradient increase every 2minutes                                                                                                                                              | Peak   |      |                    |
| 2003 | Georgiades      | CFS | CDC              | VE   | C   | Cycling: incrementation rate for individual subjects varied between 3 and 10w/min                                                                                                                          | Peak   |      | Peak               |
| 2020 | Hodges          | CFS | ICC              | VE/M | C   | Cycling: Starting at 15w and increase 15w/min                                                                                                                                                              | At VT  | Peak | RER                |
| 2013 | Icksman         | CFS | CDC              | VE   | C   | Cycling: start from 60w and increase by 30w every minute                                                                                                                                                   | Peak   |      |                    |
| 2001 | Inbar           | CFS | CDC              | M    | T   | Treadmill: Modified balke protocol - constant speed of 2.0-3.5mph while the slope is elevated by 2% every minute                                                                                           | Peak   |      | GET                |
| 2005 | Jammes          | CFS | symptoms for CFS | VE   | C   | Cycling: workload started at 20W and increased every minute of 20w until subjects stop pedalling                                                                                                           |        |      | VT                 |
| 2007 | Javierre        | CFS | CDC              | VE   | C   | Cycling: increase of 12.5 watt every one minute until exhaustion                                                                                                                                           | Peak   |      |                    |
| 2019 | Nelson          | CFS | CDC              | M    | C   | Cycling: 5minutes at 40w (male) and 30w (female) and then 5w increased every 20sec until exhaustion                                                                                                        | at VT  | Peak | VT                 |
| 2010 | Nijs            | CFS | CDC              | S    | C   | Cycling: Submaximal Aerobic Power Index test                                                                                                                                                               |        |      | Peak               |
| 2017 | Van Oosterwijck | CFS | CDC              | S    | C   | Cycling: Submaximal Aerobic Power Index test                                                                                                                                                               | Peak   |      |                    |
| 2008 | Neary           | CFS | CDC              | I    | C   | Cycling: at 60 W for a period of 2 min, followed by a work rate increase of 25 W every 2 min until exhaustion                                                                                              | Peak   |      |                    |
| 1990 | Riley           | CFS | CDC              | VE   | T   | Treadmill: Modified Bruce Protocol                                                                                                                                                                         | Peak   | Peak | Peak               |
| 1998 | Rowbottom       | CFS | Komaroff         | VE   | T   | Treadmill: Modified Bruce protocol                                                                                                                                                                         | mean   | Peak |                    |
| 2002 | Sargent         | CFS | CDC              | M    | C   | Cycling: 25w every 2 minute until the subject was not able to maintain the power output                                                                                                                    | Peak   |      | LT Peak            |
| 1996 | Sisto           | CFS | CDC              | M    | T   | Treadmill: 3.5mph with the decline increase of 2% every minute                                                                                                                                             | at GET | Peak | GET                |
| 2013 | Strahler        | CFS | CDC              | VE   | C   | Cycling: Started at 50 W for men and 30 W for women, respectively, with 40 W increments every 3 min until the subject was no longer able to continue or until predicted maximum heart rate (85% of 220bpm) | Peak   | Peak |                    |
| 2010 | Suarez          | CFS | CDC              | VE   | C   | Cycling: 20w every minute until exhaustion                                                                                                                                                                 | Peak   | Peak | Peak               |
| 2007 | Van Ness        | CFS | CDC              | VE   | C/T | Cycling or treadmill: Bruce treadmill or 10w/min ramping protocol                                                                                                                                          |        |      | AT (not specified) |
| 2021 | Van Oosterwijck | CFS | CDCP             | VE   | C   | Cycling: Submaximal Aerobic Power Index test                                                                                                                                                               | Peak   | Peak |                    |

|      |           |     |     |    |   |                                                                                                                |                  |                      |
|------|-----------|-----|-----|----|---|----------------------------------------------------------------------------------------------------------------|------------------|----------------------|
| 2010 | Vermeulen | CFS | CDC | VE | C | Cycling: RAMP protocol based on gender and history of physical examination, Weight and height                  | Peak             | AT (not specified)   |
| 2014 | Vermeulen | CFS | CDC | VE | C | Cycling: RAMP protocol based on gender and history of physical examination, Weight and height                  | Peak             | AT (not specified)   |
| 2004 | Wallman   | CFS | CDC | S  | C | Cycling: Aerobic Power Index test - Increased of 25w every minute until reaching 75%of age predicted target HR | At peak workload | 3 min after the test |

Abbreviations: FMS = Fibromyalgia Syndrome, ACR = American College of Rheumatology, VE= Voluntary Exhaustion, M= Maximal, S = Submaximal, I = Indirect, C= Cycling, T = Treadmill, HG = Handgrip, RPE = Rate of Perceived Exertion, HR = Heart Rate, AT = Anaerobic Threshold, VT = Ventilatory Threshold, GET = Gas Exchange Threshold.

Table 3. Study characteristics for the CPET studies included in the Systematic Review and Meta-analysis for Fibromyalgia.

| Year | Name       | Type | Diagn.    | Test     | Type          | Testing protocol                                                                                                                                                                                                 | RPE          | HR   | VT       | Lactate |
|------|------------|------|-----------|----------|---------------|------------------------------------------------------------------------------------------------------------------------------------------------------------------------------------------------------------------|--------------|------|----------|---------|
| 2013 | Bachassons | FMS  | ACR       | VE       | C             | Cycling: 15w initial power and increase of 15w/min for FMS and initial power at 30w increase of 30w/min for control group                                                                                        | At 75 or 50% | Peak |          | Peak    |
| 2014 | Balbaloglu | FMS  | ACR       | VE       | T             | Treadmill: Modified Bruce Protocol                                                                                                                                                                               |              | Peak |          |         |
| 2013 | Bardal     | FMS  | ACR       | VE       | C             | Cycling: Stepwise Increase of 15w/min                                                                                                                                                                            | Peak         | Peak | At 4mmol | Peak    |
| 2015 | Bardal     | FMS  | ACR       | S        | C             | Cycling: a stepwise increase in workload (10 W/min) until blood lactate concentration (bLa) reached > 5 mmol/l.                                                                                                  | mean         | Mean |          |         |
| 2021 | Berardi    | FMS  | Not Known | Strength | Elbow Flexors | Submaximal intermittent isometric and concentric muscle contractions matched for intensity (20% of maximal voluntary isometric contraction), duration (10-min), and duty-cycle (2-s contraction: 1-s relaxation) | mean         |      |          |         |
| 2006 | Cook       | FMS  | ACR 1990  | M        | C             | Cycling: 3min warm up at 20w, then 5w increase every 20sec until exhaustion                                                                                                                                      | mean         | Peak |          |         |

|      |                  |     |           |    |   |                                                                                                                                                                                    |          |      |                    |      |
|------|------------------|-----|-----------|----|---|------------------------------------------------------------------------------------------------------------------------------------------------------------------------------------|----------|------|--------------------|------|
| 2012 | Cook             | FMS | ACR 1990  | S  | C | Cycling: Constant Intensity at 40% VO <sub>2</sub> peak for 20minutes                                                                                                              | mean     | Mean |                    |      |
| 2011 | Da Cunha         | FMS | ACR       | VE | T | Treadmill: A modified Balke treadmill maximal exercise test                                                                                                                        |          | Peak |                    |      |
| 2007 | Dinler           | FMS | ACR       | VE | T | Treadmill: modified Bruce multistage protocol                                                                                                                                      |          |      |                    |      |
| 2009 | Dinler           | FMS | ACR       | VE | T | Treadmill: Standard Bruce multistage protocol                                                                                                                                      | Mean     |      |                    |      |
| 2012 | Gerdle           | FMS | Not Known | I  | C | Cycling: Astrand Indirect Protocol                                                                                                                                                 |          |      |                    |      |
| 2015 | Gomez-Cabello    | FMS | Not Known | VE | T | Treadmill: Fernhall protocol 1996                                                                                                                                                  |          |      |                    |      |
| 2010 | Hsieh            | FMS | ACR       | VE | C | Cycling: starting from 0 watt, adding increment of 10-15w/min                                                                                                                      | peak     | Peak | VT                 |      |
| 2003 | Lund             | FMS | ACR 1990  | VE | C | Cycling: Starting with two steady state submaximal levels of 6 min each [20 and 40 W 30 and 60 W], participants were exercised with continual workload increments of 10 - 20 W/min |          | Peak | VE/VO <sub>2</sub> |      |
| 1990 | Mengshoel        | FMS | Yunus     | I  | C | Cycling: Indirect and submaximal Astrand protocol                                                                                                                                  |          |      |                    |      |
| 1995 | Mengshoel        | FMS | ACR       | I  | C | Cycling: Indirect and submaximal Astrand protocol                                                                                                                                  | at 6min  |      |                    |      |
| 1994 | Norregard        | FMS | ACR       | VE | C | Cycling: initial load of 40 watts was used with stepwise increments every 3 min using the following steps, 70, 100,130,150,170,190 W until exhaustion.                             | At 6 min |      | At 2mmol (W)       | Peak |
| 2017 | Pironi - Andrade | FMS | ACR       | VE | C | Cycling: Incremental Protocol, with increment proposed by Wasserman based on age, weight, and height                                                                               |          | Peak | VT (ml/kg/min)     |      |
| 2016 | Sener            | FMS | ACR       | I  | C | Cycling: Indirect and submaximal Astrand protocol                                                                                                                                  |          |      |                    |      |

|      |              |     |       |          |               |                                                                                                                                      |         |      |        |
|------|--------------|-----|-------|----------|---------------|--------------------------------------------------------------------------------------------------------------------------------------|---------|------|--------|
| 1994 | Simms        | FMS | ACR   | VE       | C             | Cycling: 1-minute stages of 15W increases, beginning at 0 W.                                                                         | at peak | Peak |        |
| 2013 | Srikuea      | FMS | ACR   | strength | Knee Extensor | 6 sets of 12 isometric contractions with each set followed by MVIC as described above. Incremental intensity from 20% to 70%.        | mean    |      |        |
| 2005 | Staud        | FMS | ACR   | Strength | HG            | Sustained handgrip exercise at 30% of MVC for 90sec                                                                                  | End     |      |        |
| 2002 | Valim        | FMS | ACR   | VE       | T             | Treadmill: a 3 km/h load, with a 1 km/h increase every minute up to 7 km/h, after that, a 2.5% slope inclination increase up to 15%. |         | Peak | AT (%) |
| 2008 | Valkeinen    | FMS | ACR   | VE       | C             | Cycling: 3min at 50w initial load, then 20w every 2min increases                                                                     |         | Peak | Peak   |
| 1992 | Van Denderen | FMS | Yunus | VE       | C             | Cycling: Starting with 50 Watts. the workload was raised every three minutes by 30 Watts                                             |         | Peak |        |
| 2016 | Vincent      | FMS | ACR   | VE       | C             | Cycling: Incremental until reaching VO2max or patients too fatigued (not specified the increment)                                    |         | Peak |        |

Abbreviations: FMS = Fibromyalgia Syndrome, ACR = American College of Rheumatology, VE= Voluntary Exhaustion, M= Maximal, S = Submaximal, I = Indirect, C= Cycling, T = Treadmill, HG = Handgrip, RPE = Rate of Perceived Exertion, HR = Heart Rate, AT = Anaerobic Threshold, VT = Ventilatory Threshold, GET = Gas Exchange Threshold.

Table 4. Study characteristics for the Strength Assessment studies included in the Meta-analysis for Fibromyalgia and Chronic Fatigue Syndrome.

| year | Study Characteristics |           |              |     |                 | Type | Type             | VA                      | Fatigability |
|------|-----------------------|-----------|--------------|-----|-----------------|------|------------------|-------------------------|--------------|
|      | name                  | syndr.    | Diagnosis    | Sex | Matched         | test | Muscle Action    | type                    | type         |
| 2015 | Aerenhouts            | CFS       | CDC - Fukuda | F   | age - BMI       | MVC  | Handgrip         |                         |              |
| 1998 | Blackwood             | CFS       | CDC- Fukuda  | F/M | Age-sex         | MVC  | Handgrip         |                         |              |
| 2021 | Berardi               | Not Known | Physician    | F   | Age-Sex-BMI-PA  | MVC  | HG/elbow flexors | ITT                     | MVC decline  |
| 2000 | Fulcher               | CFS       | CDC - Fukuda | F/M | Age sex-BMI     | MVC  | Leg extension    | ITT (data not reported) |              |
| 2013 | Icksman               | CFS       | CDC - Fukuda | F   | Age sex and BMI | MVC  | Handgrip         |                         |              |

|      |               |     |                  |     |                 |                                          |                       |                               |
|------|---------------|-----|------------------|-----|-----------------|------------------------------------------|-----------------------|-------------------------------|
| 2014 | Icksman       | FMS | CDC - Fukuda     | F   | Age sex and BMI | MVC                                      | Handgrip              |                               |
| 1991 | Lloyd         | CFS | Lloyd et al 1988 | F/M | age-BMI         | MVC                                      | Elbow flexion         | ITT (endurance sequence test) |
| 2010 | Maquet        | CFS | CDC - Fukuda     | F   | Age sex and BMI | Submaximal Isometric Contraction         | Arm Abduction         | Time to exhaustion            |
| 2018 | Nacul         | CFS | CDC              | -   | None            | MVC                                      | Handgrip              |                               |
| 1999 | Paul          | CFS | CDC - Fukuda     | F/M | age sex-BMI     | MVC-Torque                               | Leg extension         | fatigue index (%MVC)          |
| 1999 | Sacco         | CFS | CDC - Fukuda     | F/M | age-sex-BM      | MVC (N)                                  | Elbow flexor          | endurance time                |
| 2004 | Siemionow     | CFS | CDC - Fukuda     | F/M | age-sex-BMI     | MVC (N)                                  | Handgrip              |                               |
| 2010 | Aparicio      | FMS | ACR              | M   | Age Sex BMI     | Isometric MAX                            | Handgrip              |                               |
| 2011 | Aparicio      | FMS | ACR              | F   | Age Sex BMI     | Isometric MAX                            | Handgrip              |                               |
| 2013 | Aparicio      | FMS | ACR              | F   | Age Sex BMI     | Isometric MAX                            | Handgrip              |                               |
| 2013 | Aparicio      | FMS | ACR              | F   | Age Sex BMI     | Isometric MAX                            | Handgrip              |                               |
| 2015 | Aparicio      | FMS | ACR              | F   | Age Sex BMI     | Isometric MAX                            | Handgrip              |                               |
| 2013 | Bachassons    | FMS | ACR              | F   | Age Sex BMI     | MVC                                      | Leg extension         |                               |
| 1999 | Borman        | FMS | ACR              | F   | age and sex     | isokinetic (PT)                          | Lex extension/flexors | Endurance ratio               |
| 2018 | Ceron Lorente | FMS | ACR              | ?   | Age - BMI       | MVC                                      | Leg extension         |                               |
| 2001 | Eiert         | FMS | ACR              | F   | Age -Sex BMI    | Isokinetic (PT)                          | Shoulder Abduction    |                               |
| 2012 | Ge            | FMS | ACR              | F   | Age - Sex - BMI |                                          | Shoulder Abduction    |                               |
| 2013 | Gerdle        | FMS | ACR              | F   | Sex- BMI        | MVC and submaximal Isometric Contraction | Handgrip              | Endurance/Time                |

|      |                |     |               |     |                    |                                  |                                        |                                    |
|------|----------------|-----|---------------|-----|--------------------|----------------------------------|----------------------------------------|------------------------------------|
| 2016 | Gerdle         | FMS | ACR           | F   | age and sex        | MVC                              | Elbow Flexion                          |                                    |
| 2016 | Gerdle         | FMS | ACR           | F   | age and sex        | MVC                              | Leg extension                          |                                    |
| 2012 | Goes           | FMS | ACR           | F   | Age-sex-BMI-PA     | MVC - Torque                     | Leg extension                          |                                    |
| 2016 | Goes           | FMS | ACR           | F   | Age-sex-BMI        | MVC                              | plantar flexion and dorsiflexion       | CAR                                |
| 2008 | Giske          | FMS | ACR           | F   | age sex and weight | MVC                              | Quadriceps                             |                                    |
| 2021 | Jäkel          | CFS | CCC           | F/M | Age-Sex            | MVC                              | Quadriceps/HG                          | Fatigue Ratio                      |
| 2015 | Gomez-Cabello  | FMS | ACR           | F   | Age -Sex           | MVC                              | Leg extension and Handgrip             |                                    |
| 2022 | Kapuczinski    | CFS | ACR           | F   | Sex                | MVC                              | Handgrip                               |                                    |
| 2015 | Koklu          | FMS | ACR           | F   | Age-sex-BMI        | MVC                              | Handgrip                               |                                    |
| 2018 | Larsson        | FMS | ACR           | F   | Age - sex          | MVC                              | Leg extension/ Elbow flexion/ Handgrip |                                    |
| 2015 | La Torre Roman | FMS | ACR           | F/M | Age                | MVC                              | Handgrip                               |                                    |
| 2014 | Lee            | FMS | ACR           | F/M | BMI                | MVC                              | Handgrip                               |                                    |
| 2012 | Klaver - Kol   | FMS | ACR           | F/M | Age sex and BMI    | MVC                              | Elbow flexor                           |                                    |
| 2002 | Maquet         | FMS | ACR           | F   | Age -Sex - BMI     | MVC/ Isokinetic (PT)             | Leg (extensors/flexors)                | NCW                                |
| 2005 | Maquet         | FMS | ACR           | F   | Age sex and BMI    | Isokinetic (PT)                  | Leg (extensors/flexors)                | NCW                                |
| 2010 | Maquet         | FMS | ACR           | F   | Age - Sex - BMI    | Submaximal Isometric contraction |                                        | Endurance/Time                     |
| 1990 | Mengshoel      | FMS | Yunus         | F   | Age - Sex          | MVC, Dynamic, Static (paper)     | Handgrip                               | n. contraction in 30 sec/ time (s) |
| 1993 | Nordenskiöld   | FMS | ACR           | F   | Sex Matched        | Sustained MVC (10sec)            | Handgrip                               |                                    |
| 1994 | Nørregard      | FMS | ACR           | F   | age-sex-BMI        | MVC                              | Leg extension                          | VA<br>Endurance time (min)         |
| 1995 | Nørregard      | FMS | ACR           | F   | Age-sex-BMI        | MVC                              | Leg extension                          | VA                                 |
| 2006 | Panton         | FMS | Not mentioned | F   | age-sex-BMI        | MVC                              | Handgrip                               |                                    |
| 2004 | Sahin          | FMS | ACR           | F   | age sex-BMI        | MVC                              | Handgrip                               |                                    |

|      |               |     |     |   |                |                       |                                |     |                  |
|------|---------------|-----|-----|---|----------------|-----------------------|--------------------------------|-----|------------------|
| 2020 | Salaffi       | FMS | ACR | F | Age-sex-BMI    | sustained MVC (30sec) | Handgrip                       |     |                  |
| 2019 | Sempere-Rubio | FMS | ACR | F | Age - Sex      | MVC                   | Handgrip, Elbow flexion        |     |                  |
| 2016 | Sener         | FMS | ACR | F | age-sex-BMI    | MVC                   | Handgrip                       |     |                  |
| 1994 | Simms         | FMS | ACR | F | age-sex-BMI    | MVC                   | Trapezius/Tibialis             |     |                  |
| 2013 | Srikuea       | FMS | ACR | F | Age-sex-BMI    | MVC                   | Knee extensors                 | CAR | loss of strength |
| 2020 | Tavares       | FMS | ACR | F | Age-sex-BMI    | Isokinetic (PT)       | Knee (extensor /flexor)        |     | fatigue index    |
| 2015 | Umeda         | FMS | ACR | F | Age -sex       | MVC                   | Handgrip                       |     |                  |
| 2008 | Valkeinen     | FMS | ACR | F | Age-sex-BMI    | MVC                   | Leg extension                  |     |                  |
| 2018 | Villafaina    | FMS | ACR | F | Age - Sex -BMI | MVC                   | Handgrip                       |     |                  |
| 2022 | Wählén        | FMS | ACR | F | Age - Sex      | Maximal Tests         | Leg extension/elbow flexors/HG |     |                  |

Abbreviations: FMS = Fibromyalgia Syndrome, CFS = Chronic Fatigue Syndrome, ACR = American College of Rheumatology, F =Female, M= Male, BMI = Body Mass Index, ITT= Interpolated twitch technique, CAR = Central Activation Ratio, NCW = Normalized Cumulative Work - PA = Physical activity CCC- Canadian Consensus Criteria.

Table 5. Study characteristics for the Body Composition studies included in the Meta-analysis for Fibromyalgia and Chronic Fatigue Syndrome.

| year | Study Characteristics |          |           |     |                 | Test                                   | Muscle Volume | Muscle mass           | Fat Mass         |
|------|-----------------------|----------|-----------|-----|-----------------|----------------------------------------|---------------|-----------------------|------------------|
|      | name                  | Syndrome | Diagnosis | Sex | Matched         | type                                   | Type          | type                  | type             |
| 2017 | Acosta-Manzano        | FMS      | ACR       | F   | Age             | BIA                                    |               |                       | Fat Mass (%)     |
| 2020 | Andretta              | FMS      | ACR       | F   | Age-BMI         | DEXA                                   |               | Lean Mass (%)         | Fat Mass (%)     |
| 2013 | Aparicio              | FMS      | ACR       | F   | Age -BMI        | BIA                                    |               | Muscle Mass (kg)      | Fat Mass (%)     |
| 2015 | Aparicio              | FMS      | ACR       | F   | Age - Sex -BMI  | BIA                                    |               | Muscle Mass (kg)      | Fat Mass (%)     |
| 2013 | Bachassons            | FMS      | ACR       | F   | Age - Sex -BMI  | Skinfolds - Truncated cone calculation | Thigh         |                       | Fat Mass (%)     |
| 2021 | Berardi               | FMS      | Not Known | F   | Age- sex-BMI-PA |                                        |               |                       |                  |
| 2012 | Gerdle                | FMS      | ACR       | F   | Age - Sex -BMI  | MRI                                    | Thigh         |                       | Subcutaneous Fat |
| 2015 | Gomez-Cabello         | FMS      | ACR       | F   | Age - Sex       | DEXA                                   |               | Lean Muscle Mass (kg) | Fat mass (kg)    |
| 2022 | Kapuczinski           | FMS      | ACR       | F   | Sex             | BIA                                    |               | Lean Mass (kg)        | Fat mass (kg)    |

|      |                |     |     |     |             |      |                                  |               |
|------|----------------|-----|-----|-----|-------------|------|----------------------------------|---------------|
| 2015 | La Torre-Roman | FMS | ACR | F/M | Age         | BIA  | Muscle Mass (kg)                 |               |
| 2006 | Lowe           | FMS | ACR | F   | Age-Sex-BMI | BIA  | Fat Free Weight (kg)             | Fat Mass (%)  |
| 1994 | Norregard      | FMS | ACR | F   | Age-Sex-BMI | MRI  | Fat free area (cm <sup>2</sup> ) |               |
| 1995 | Norregard      | FMS | ACR | F   | Age-Sex-BMI | MRI  | Sum-max Area (cm <sup>2</sup> )  |               |
| 2017 | Paiva          | FMS | ACR | F   | Age-Sex-BMI | DEXA |                                  | Fat Mass (kg) |
| 2014 | Segura         | FMS | ACR | F   | Age         | BIA  | Muscle Mass (kg)                 | Fat Mass (%)  |
| 2016 | Sener          | FMS | ACR | F   | Age-Sex-BMI | BIA  |                                  | Fat Mass (%)  |
| 2013 | Srikuea        | FMS | ACR | F   | Age-Sex-BMI | DEXA | Lean Muscle Mass (kg)            | Fat Mass (%)  |
| 2016 | Vincent        | FMS | ACR | F   | Sex-BMI     | DEXA |                                  | Fat Mass (%)  |

Abbreviations: FMS = Fibromyalgia Syndrome, ACR = American College of Rheumatology, F =Female, BMI = Body Mass Index, BIA = Bio-Electrical Impedance Analysis, DEXA = Dual-energy X-ray absorptiometry.
