# Supplementary material for: Fibromyalgia and Chronic Fatigue Syndromes: A systematic review and meta-analysis of cardiorespiratory fitness and neuromuscular function compared with healthy individuals
Source: PubMed Central journal article supplement (PMC9584387; doi:10.1371/journal.pone.0276009), 2022-10-20
Supplement: pone.0276009.s003.pdf [file pone.0276009.s003.pdf]

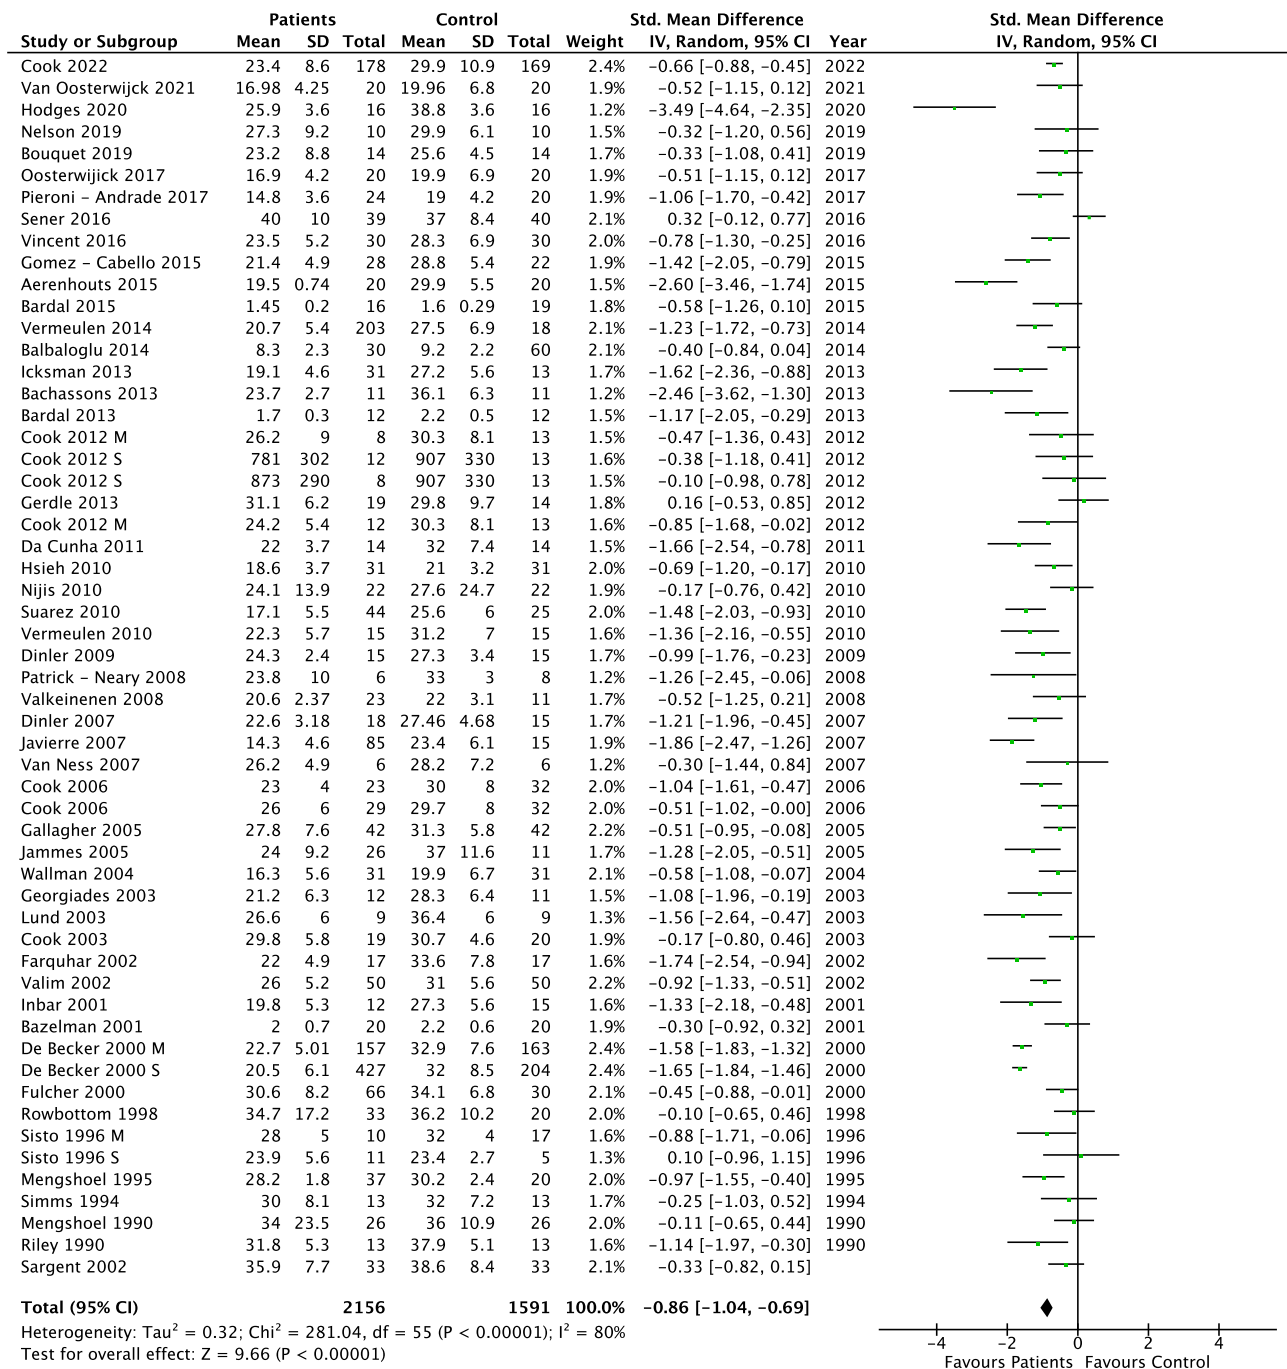

Figure A. Peak Oxygen Consumption (VO<sub>2</sub> Peak) values for all studies included in the analysis.

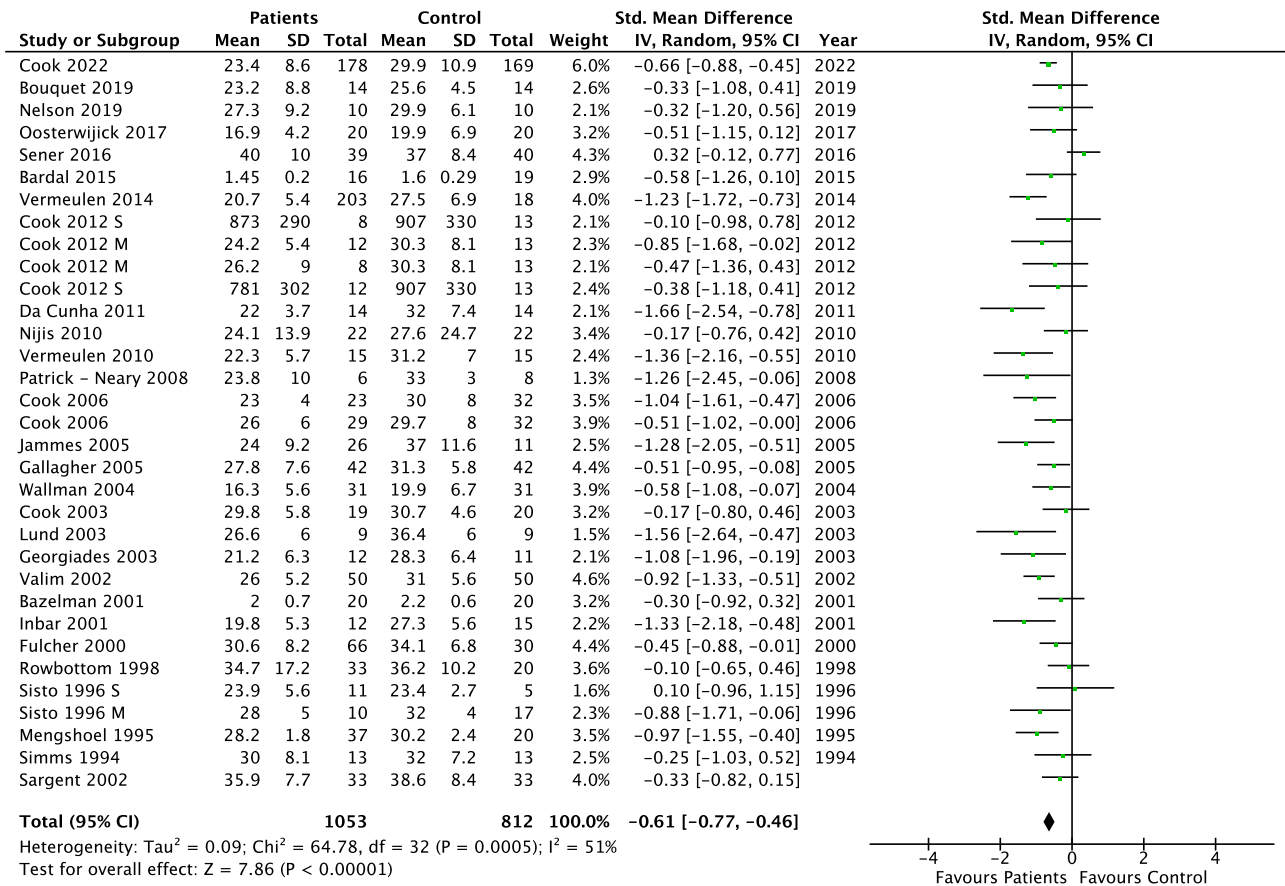

Figure A1. Peak Oxygen Consumption (VO<sub>2</sub> Peak) values after sensitivity analysis.

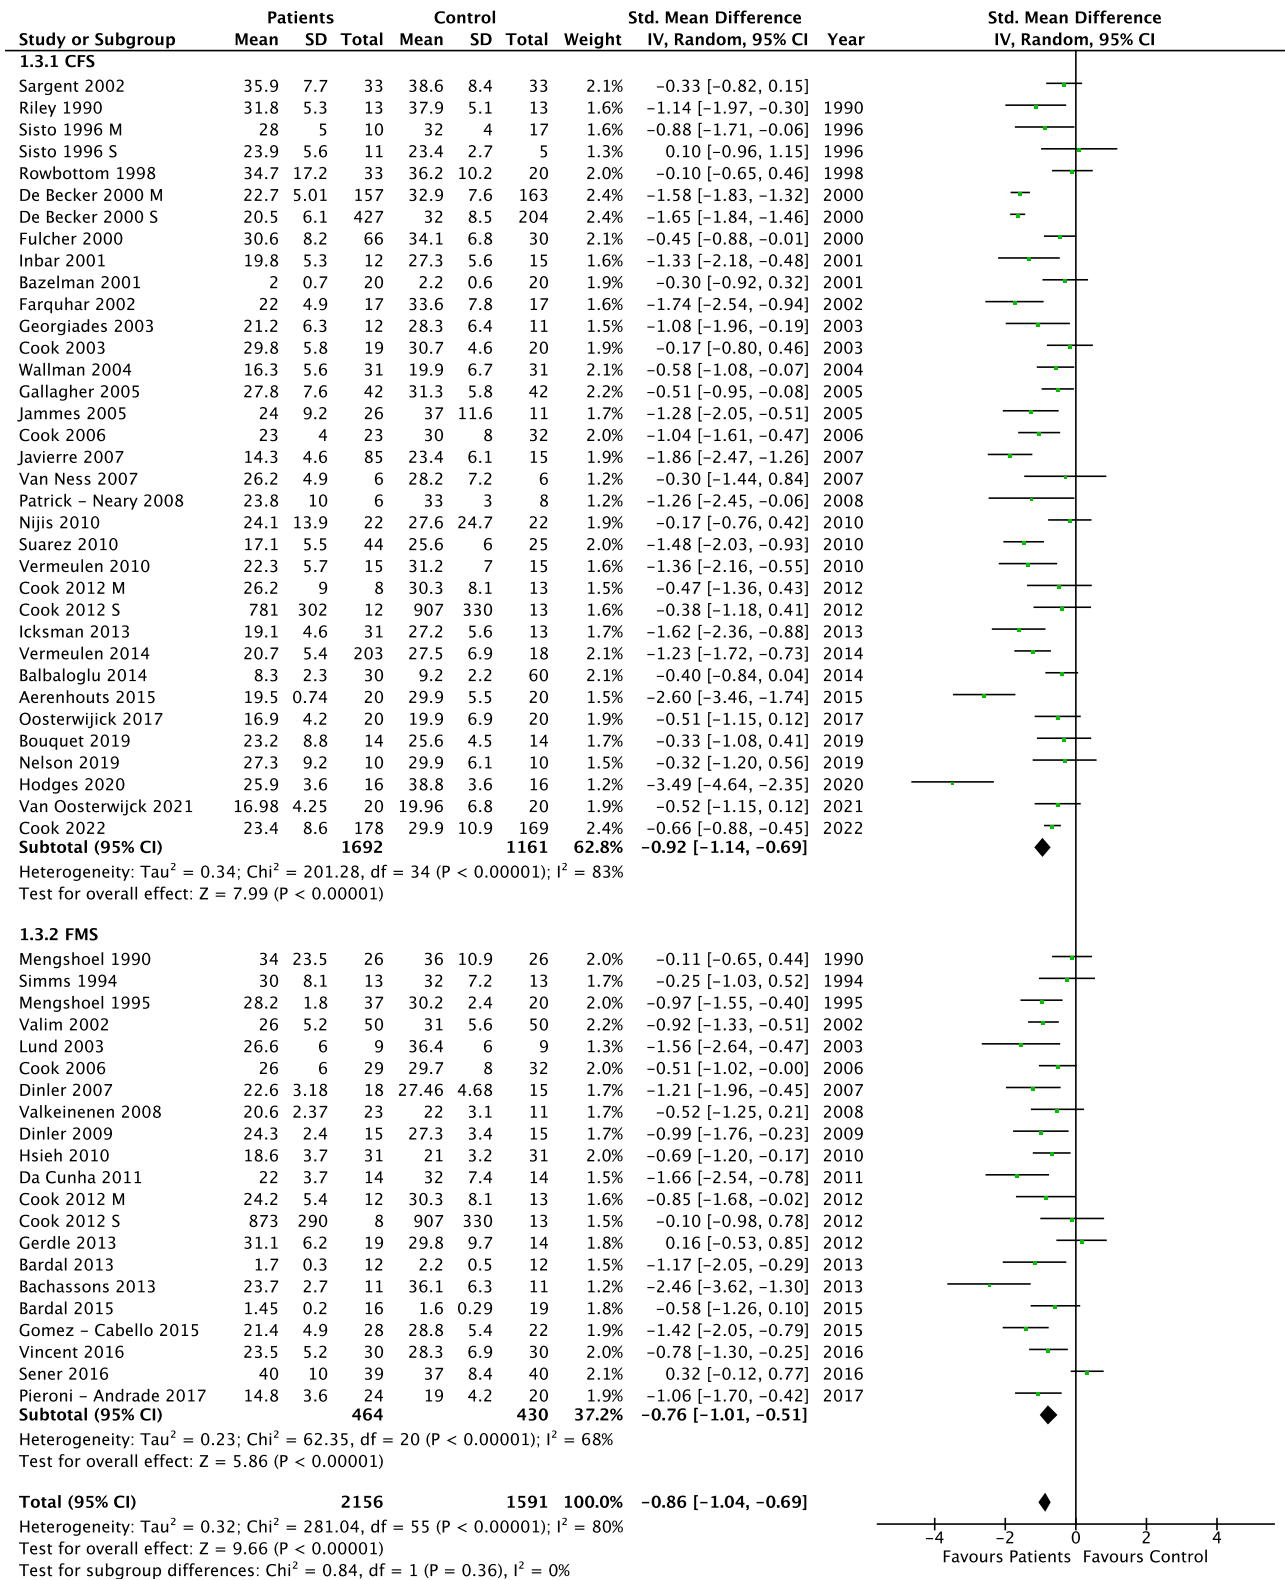

Figure A2. Peak Oxygen Consumption (VO<sub>2</sub> Peak) values between CFS and FMS

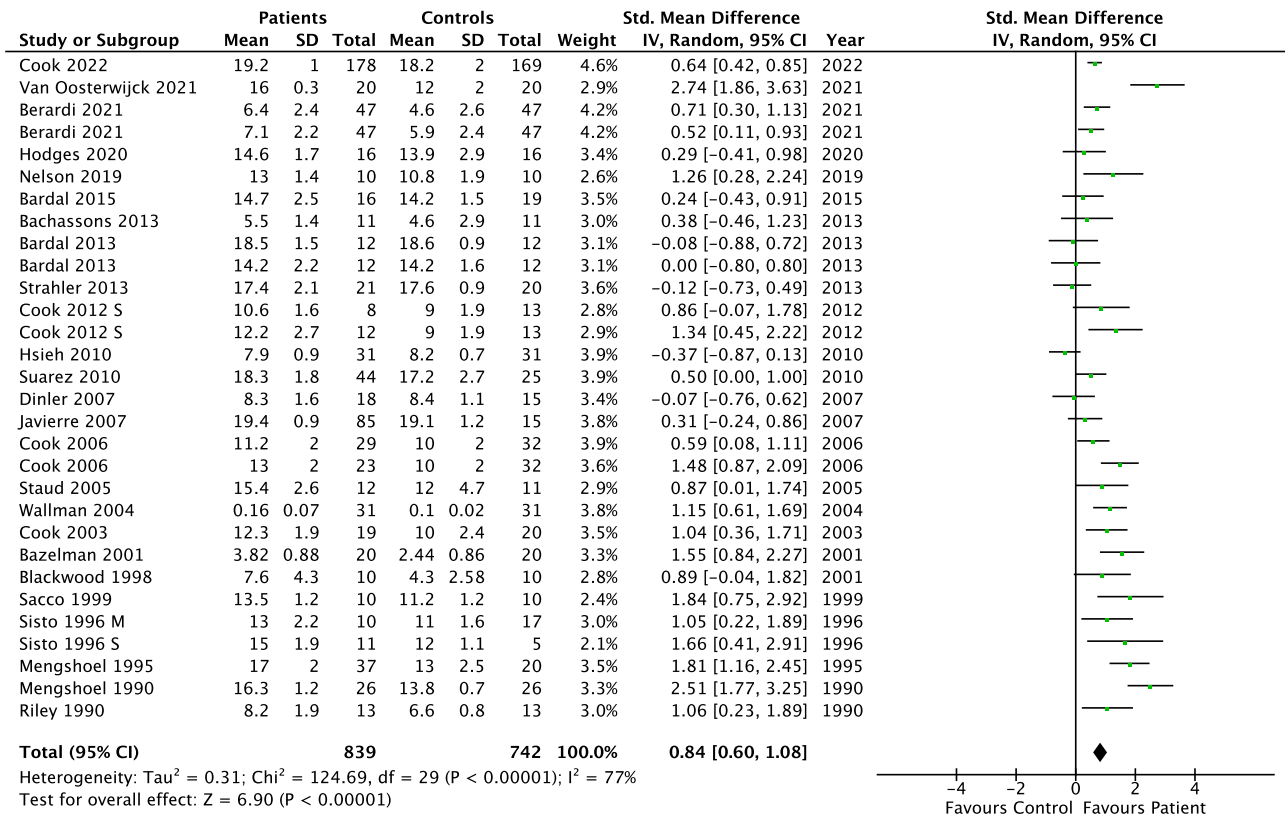

Figure B. Rate of Perceived Exertion (RPE) values for all studies included in the analysis.

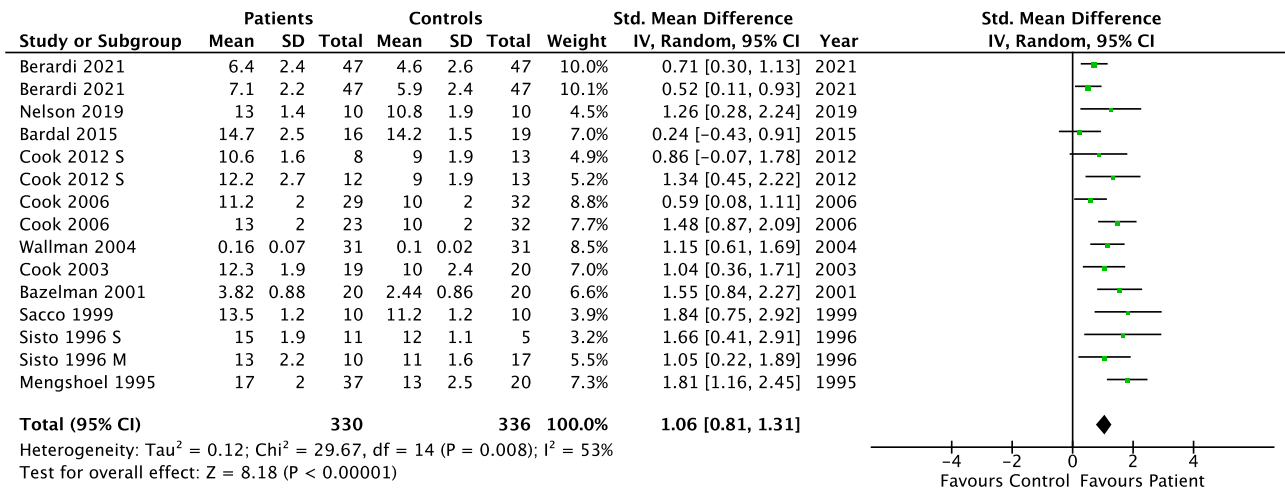

Figure B1. Rate of Perceived Exertion (RPE) values for all studies after sensitivity analysis.

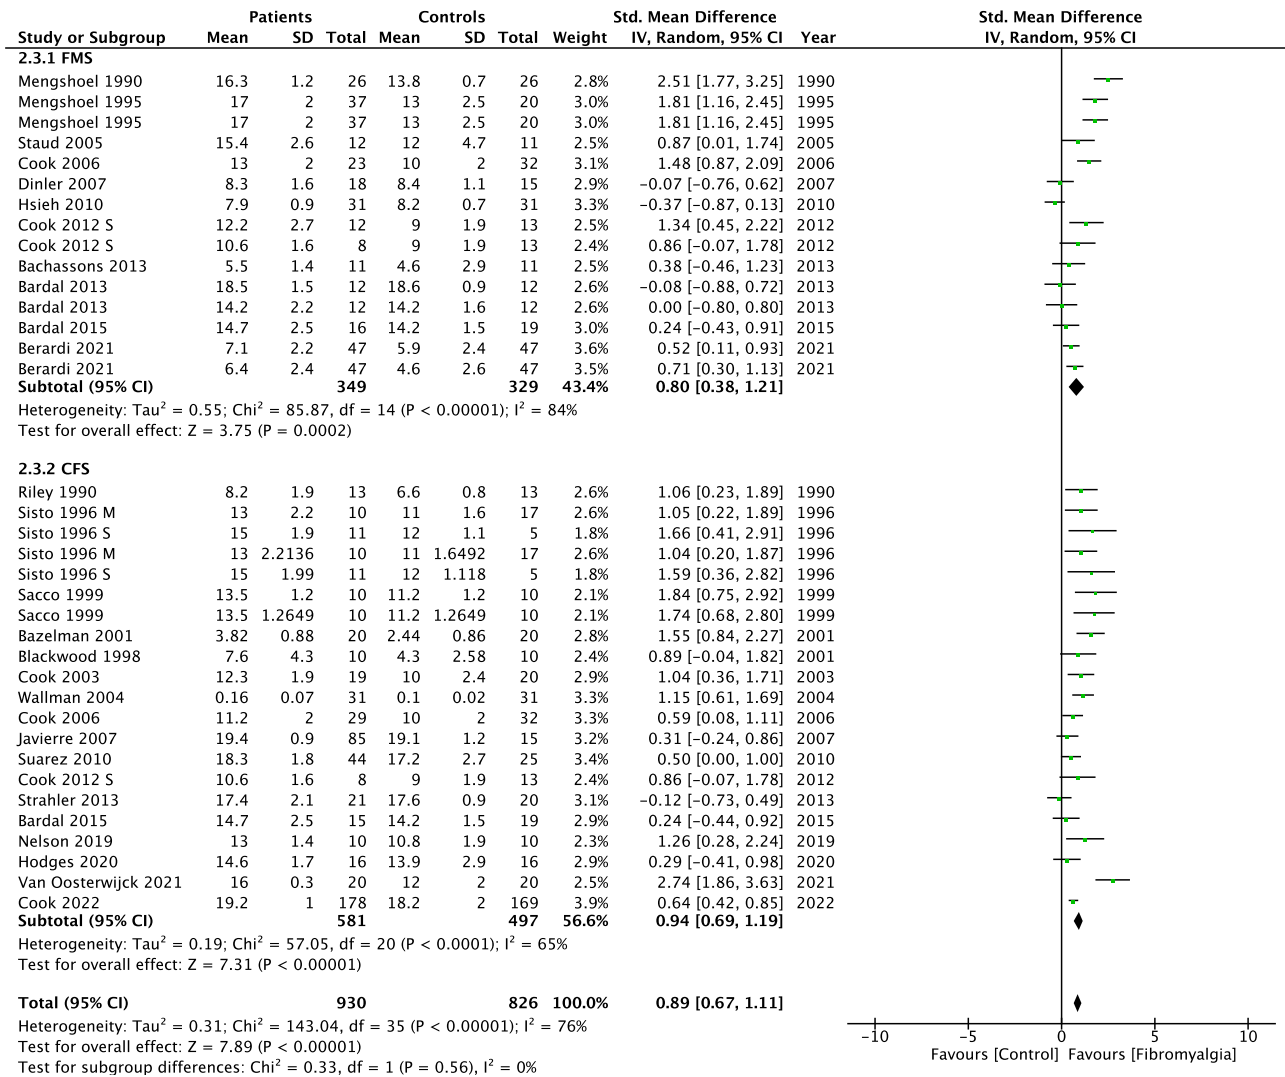

Figure B2. Rate of Perceived Exertion (RPE) values for all studies between CFS and FMS patients.

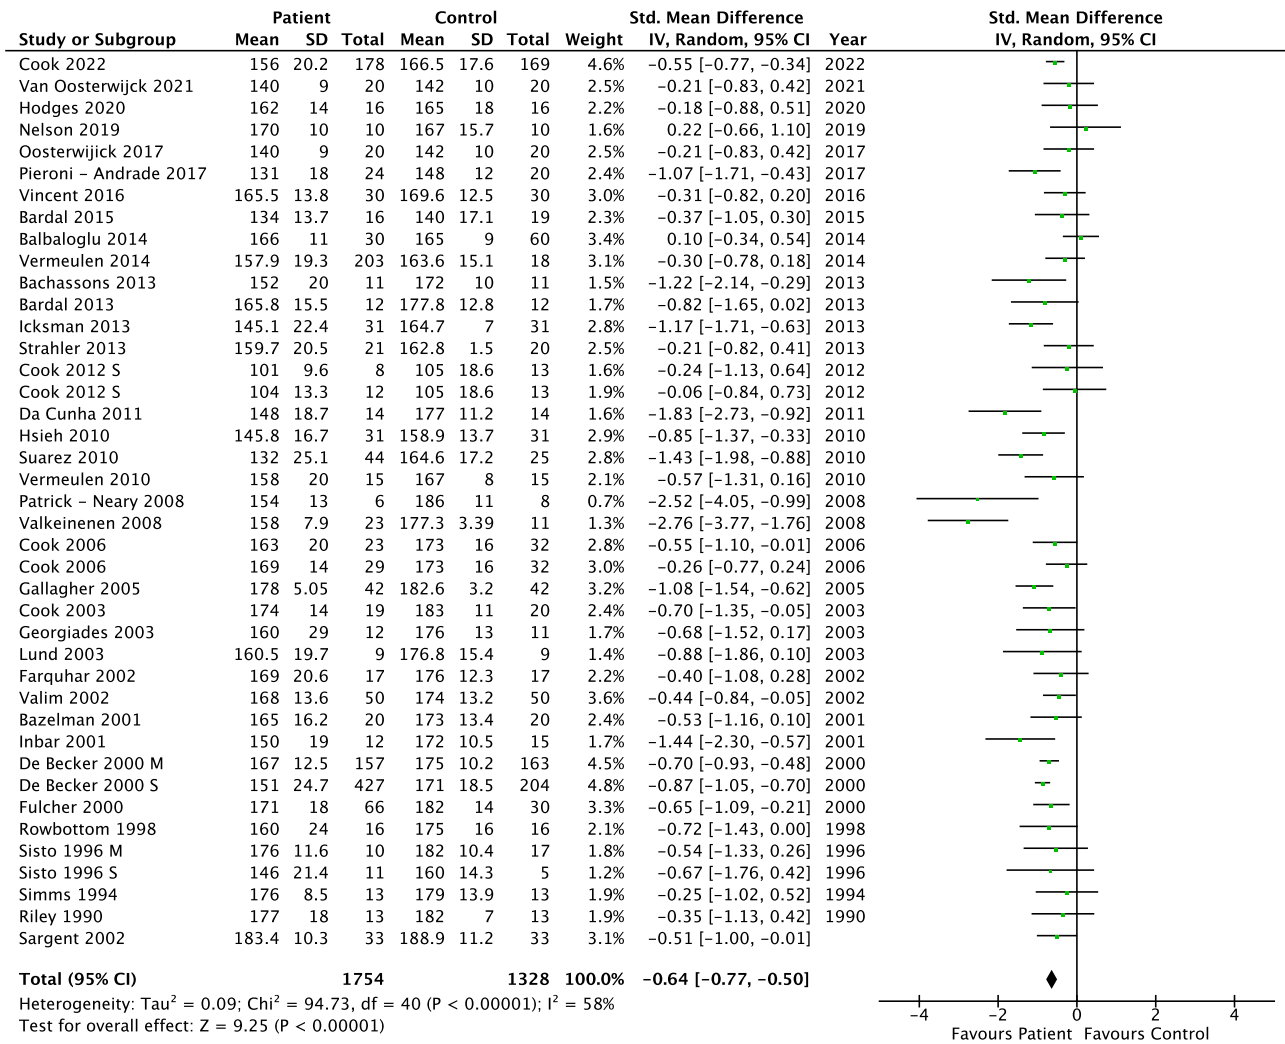

Figure C. Peak Heart Rate (HR) values for all studies included in the analysis.

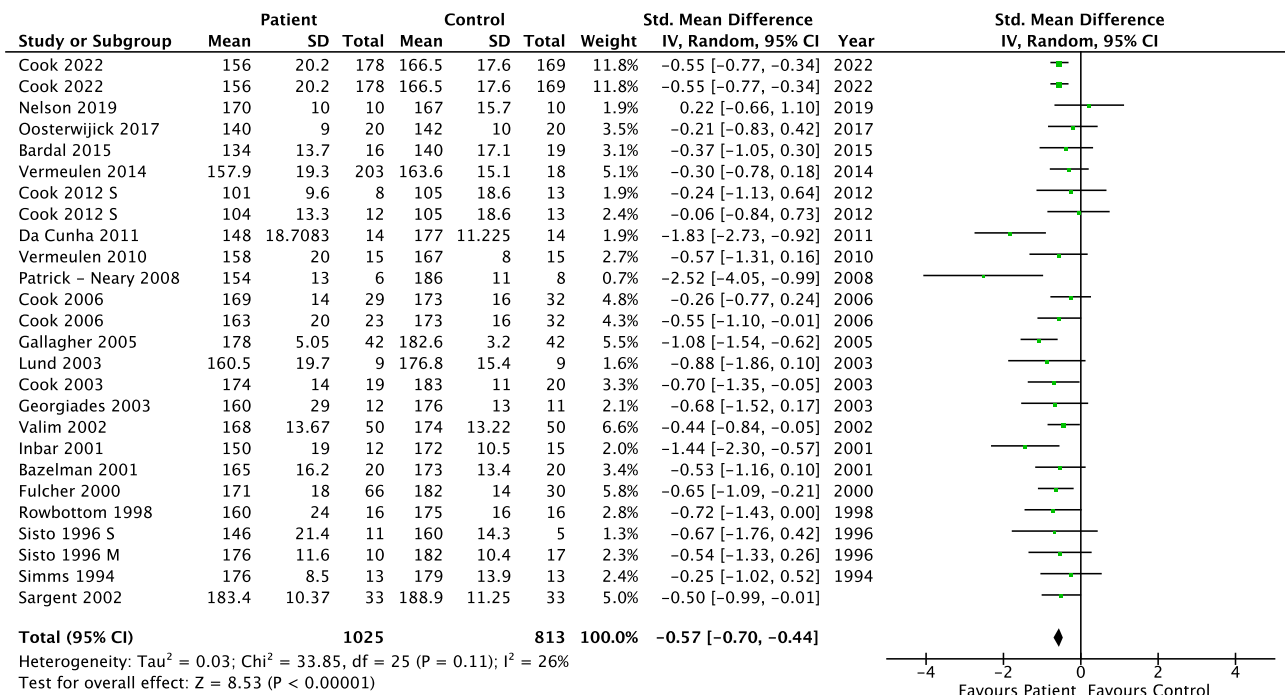

Figure C1. Peak Heart Rate (HR) values for all studies after sensitivity analysis.

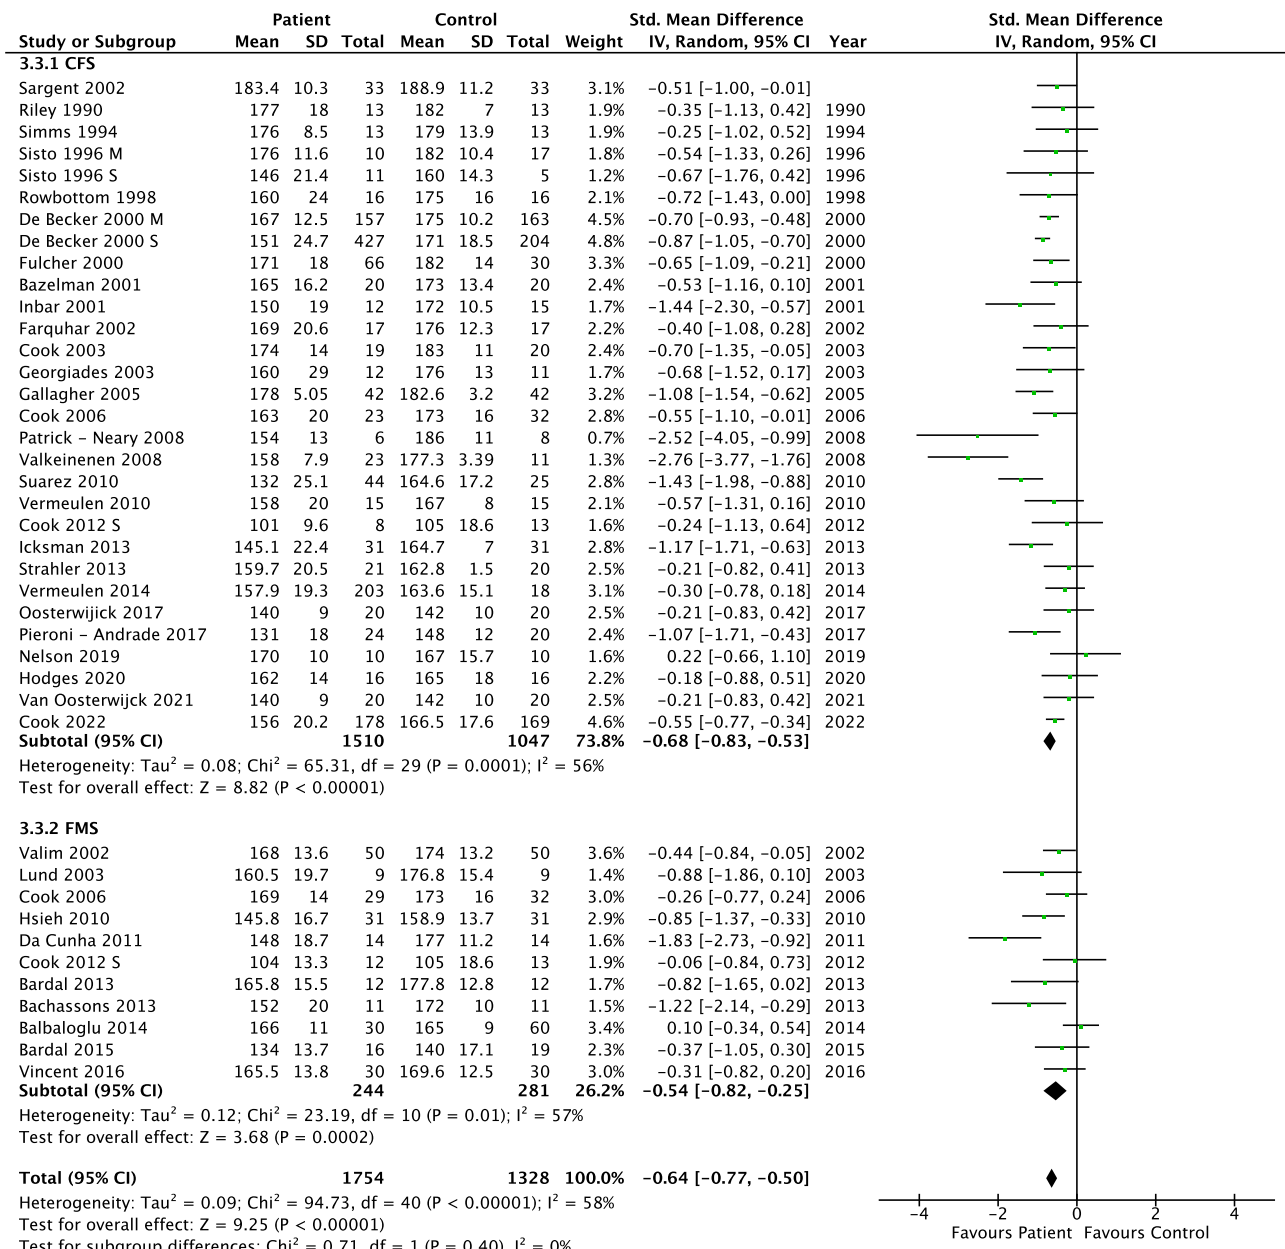

Figure C2. Peak Heart Rate (HR) values for all studies between CFS and FMS patients.



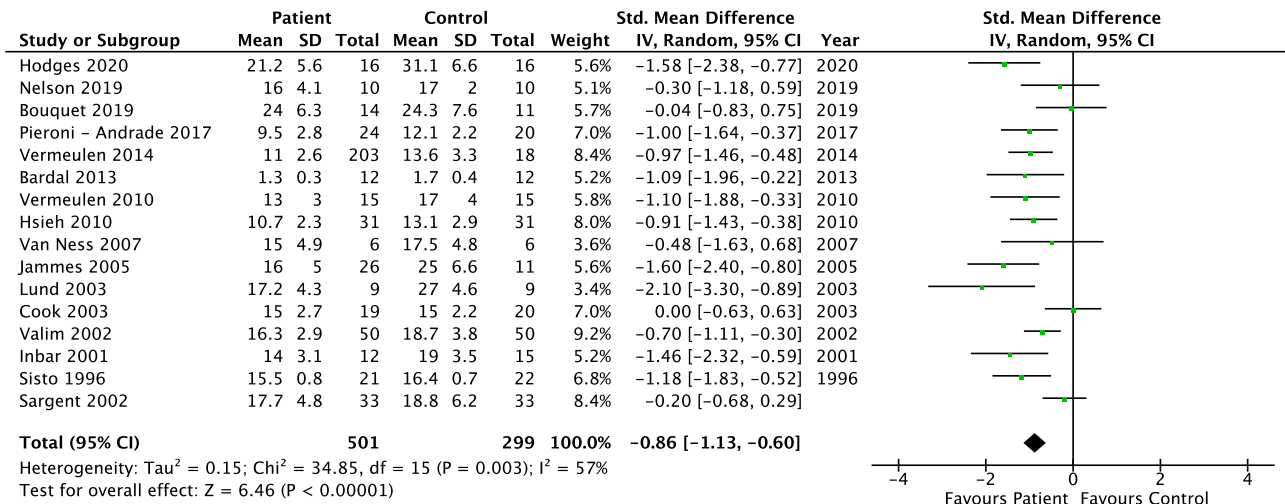

Figure D. Anaerobic Threshold (AT) values for all studies included in the analysis.

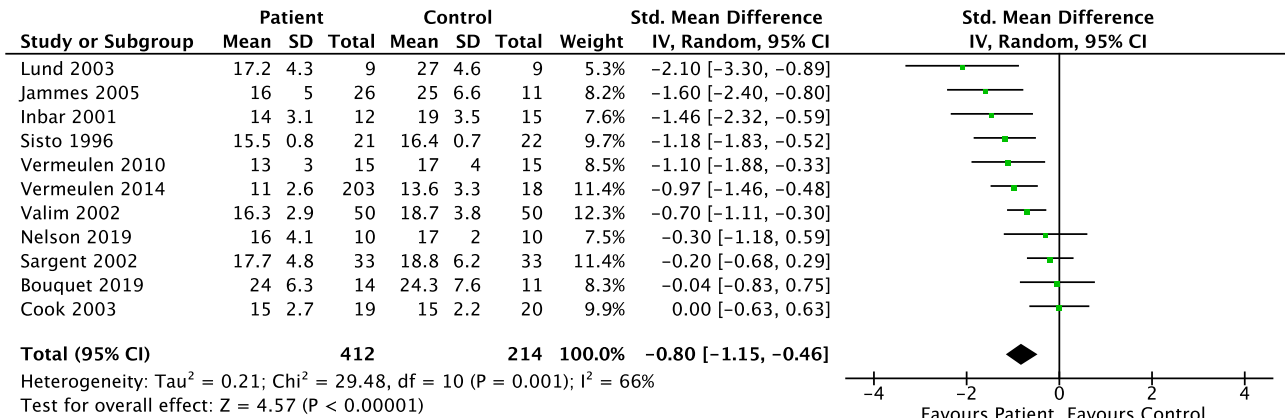

Figure D1. Anaerobic Threshold (AT) values for all studies after sensitivity analysis.

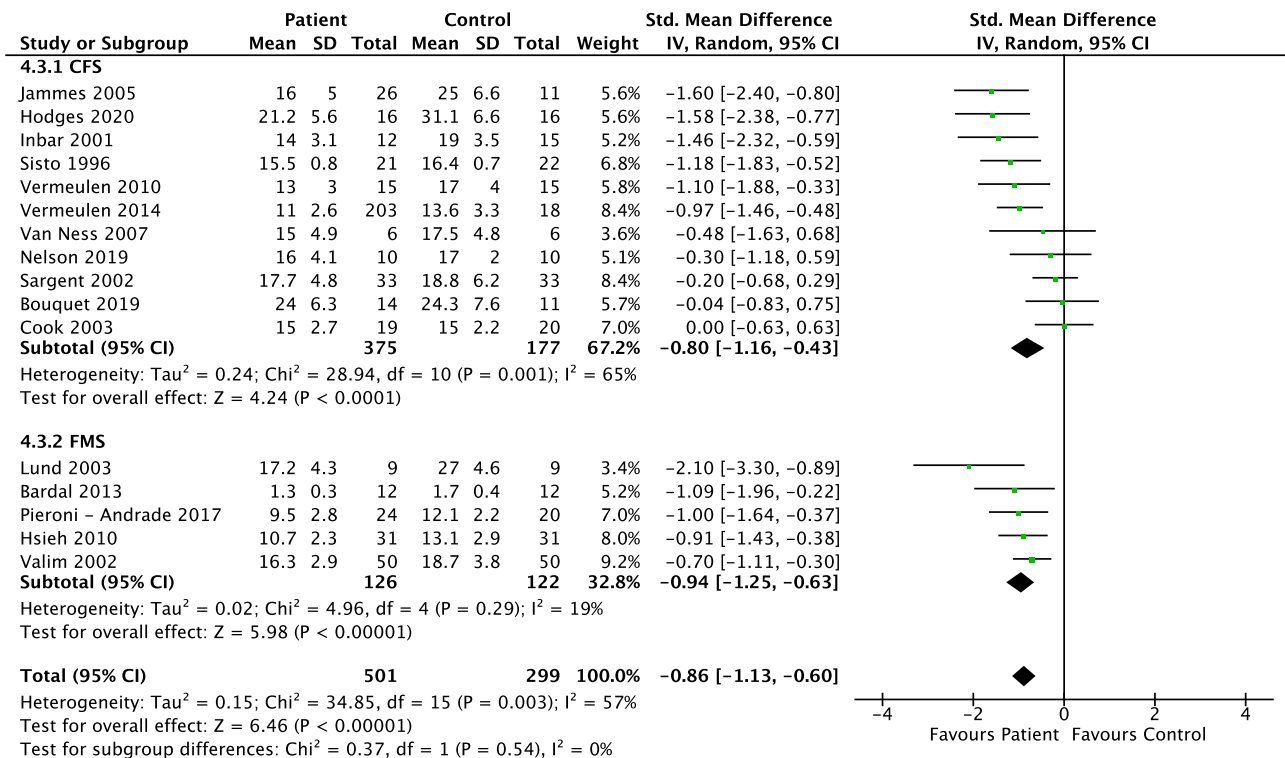



Figure D2. Anaerobic Threshold (AT) values for all studies between FMS and CFS

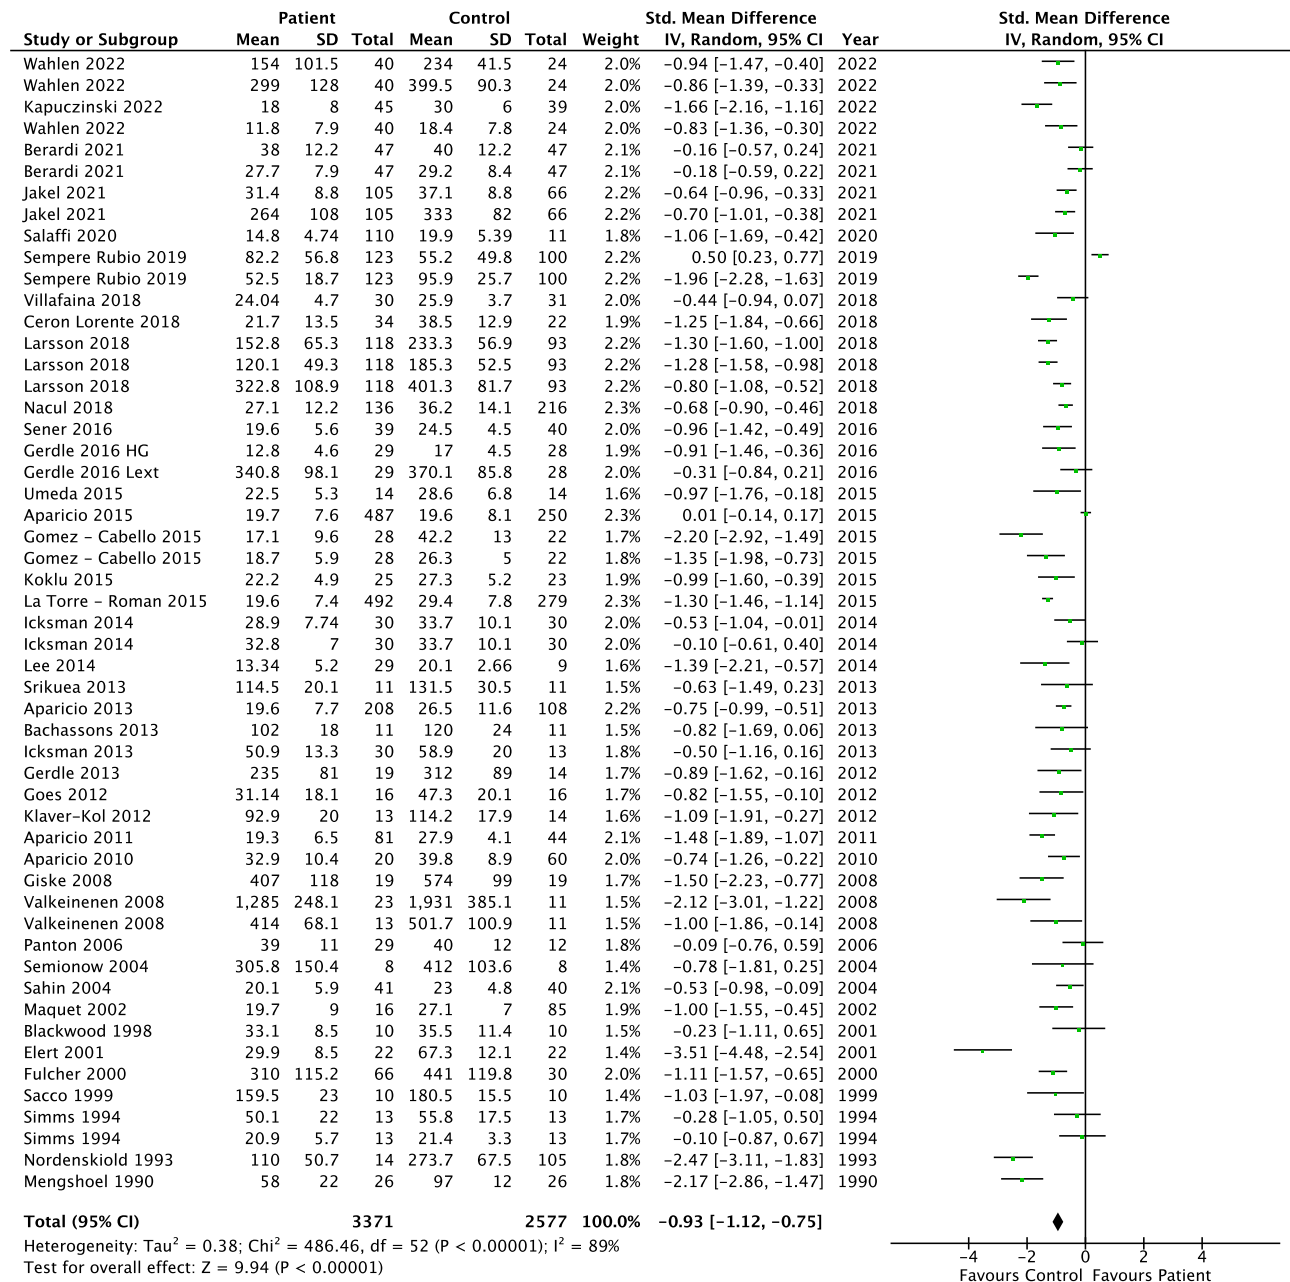

Figure E. Maximal Voluntary Contraction (MVC) values for all studies included in the analysis.

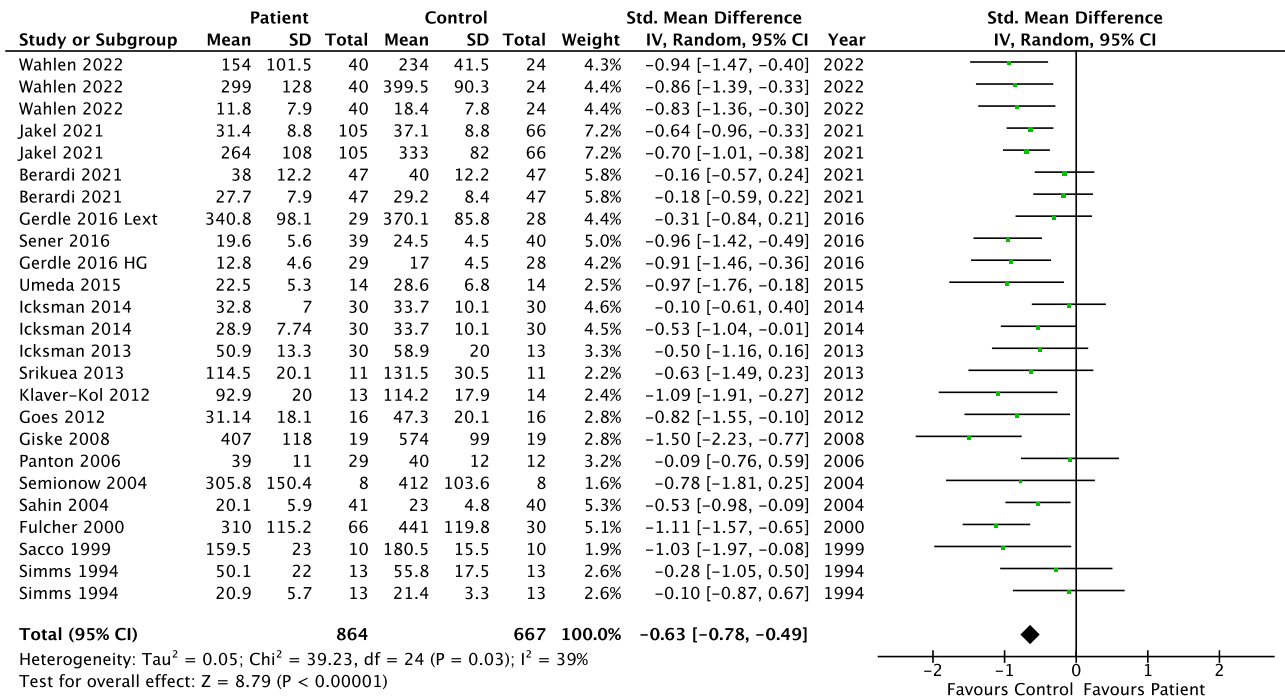

Figure E1. Maximal Voluntary Contraction (MVC) values for all studies after sensitivity analysis.

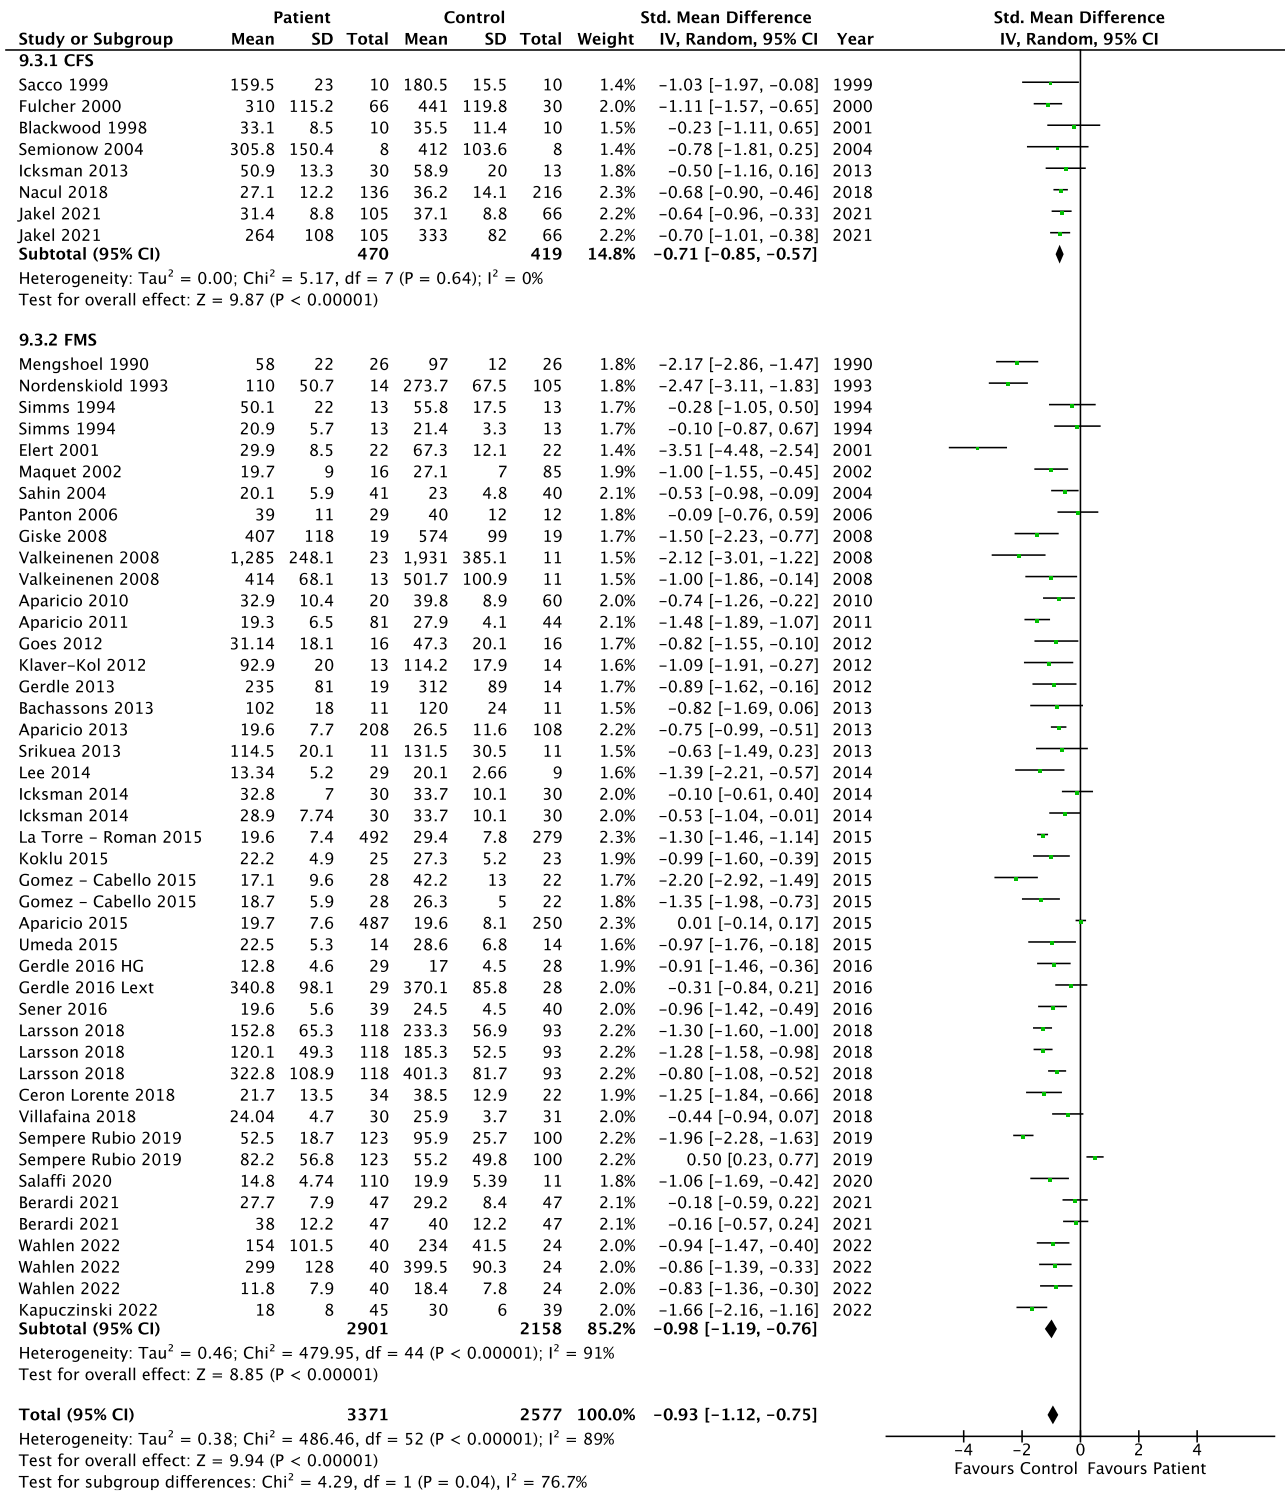

Figure E2. Maximal Voluntary Contraction (MVC) values for all CFS and FMS patients.

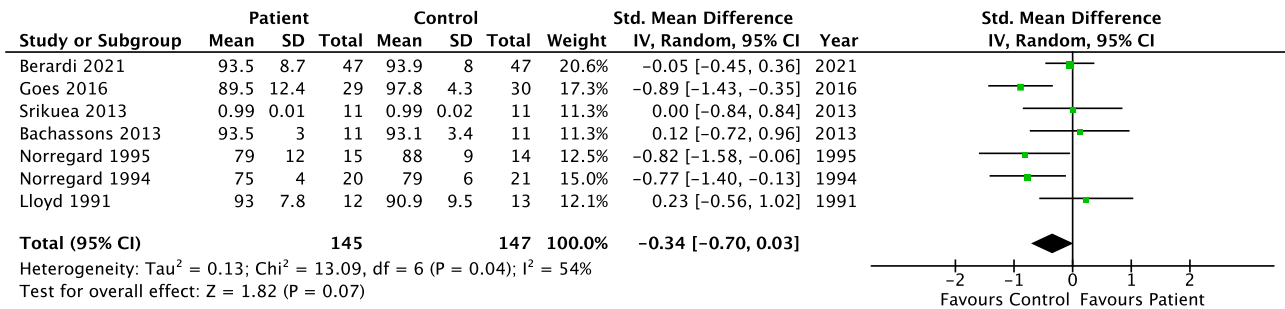

Figure F. Voluntary Activation values for all studies included in the analysis.

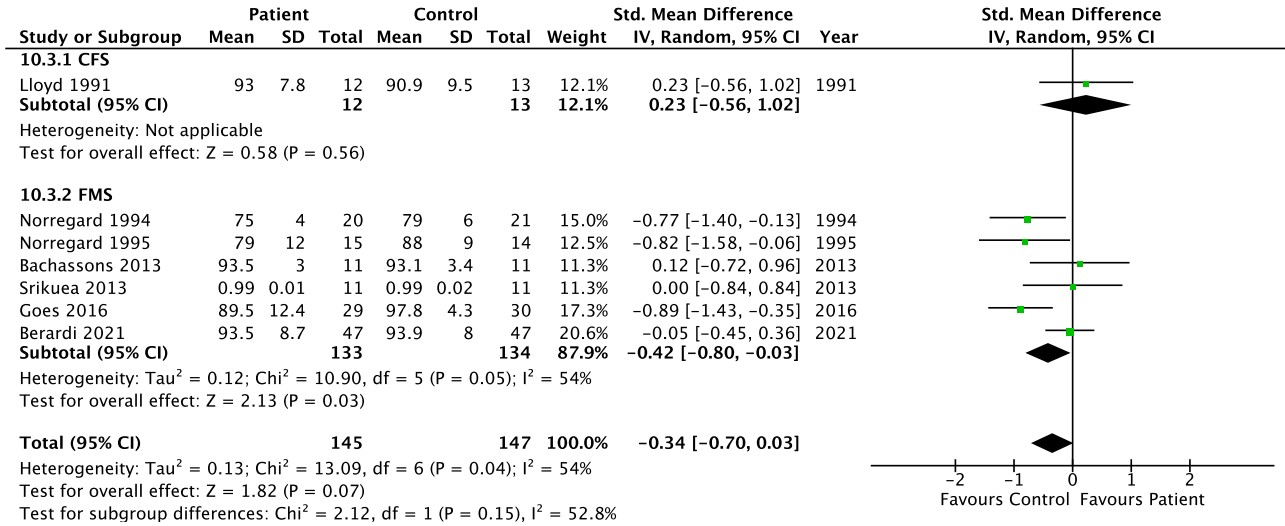

Figure F1. Voluntary Activation values for CFS and FMS patients

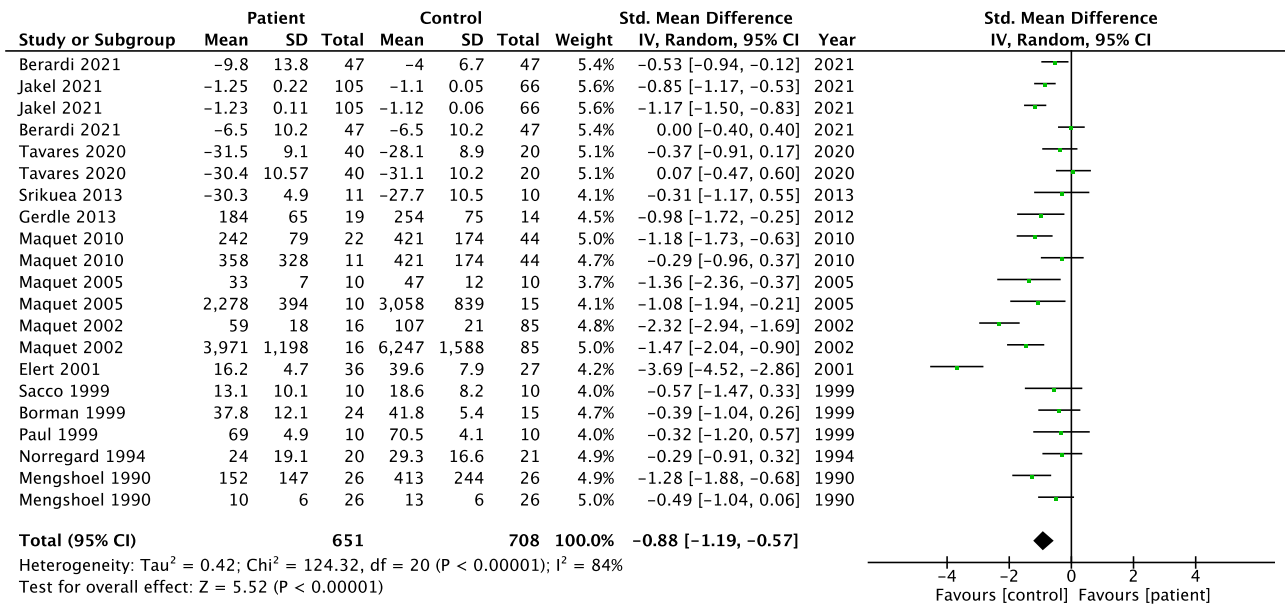

Figure G. Fatigability values for all studies included in the analysis.

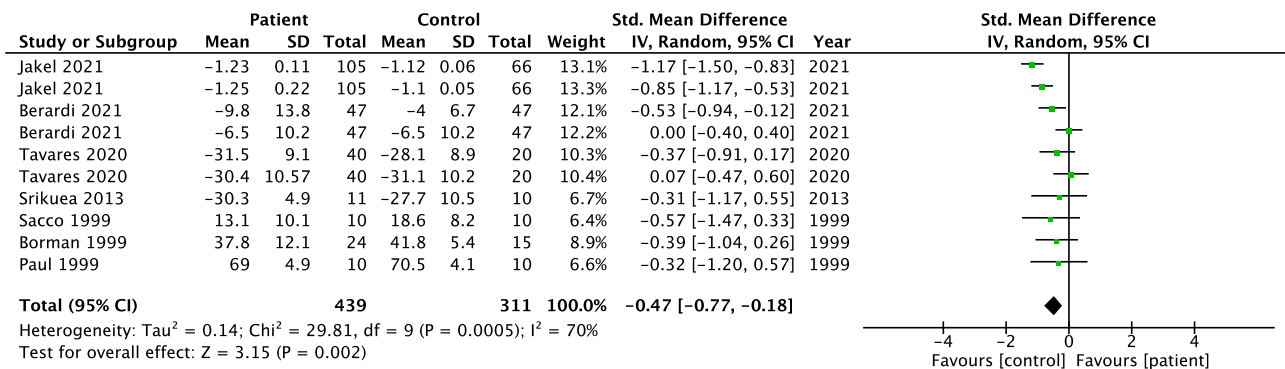

Figure G1. Fatigability values for all studies after sensitivity analysis.

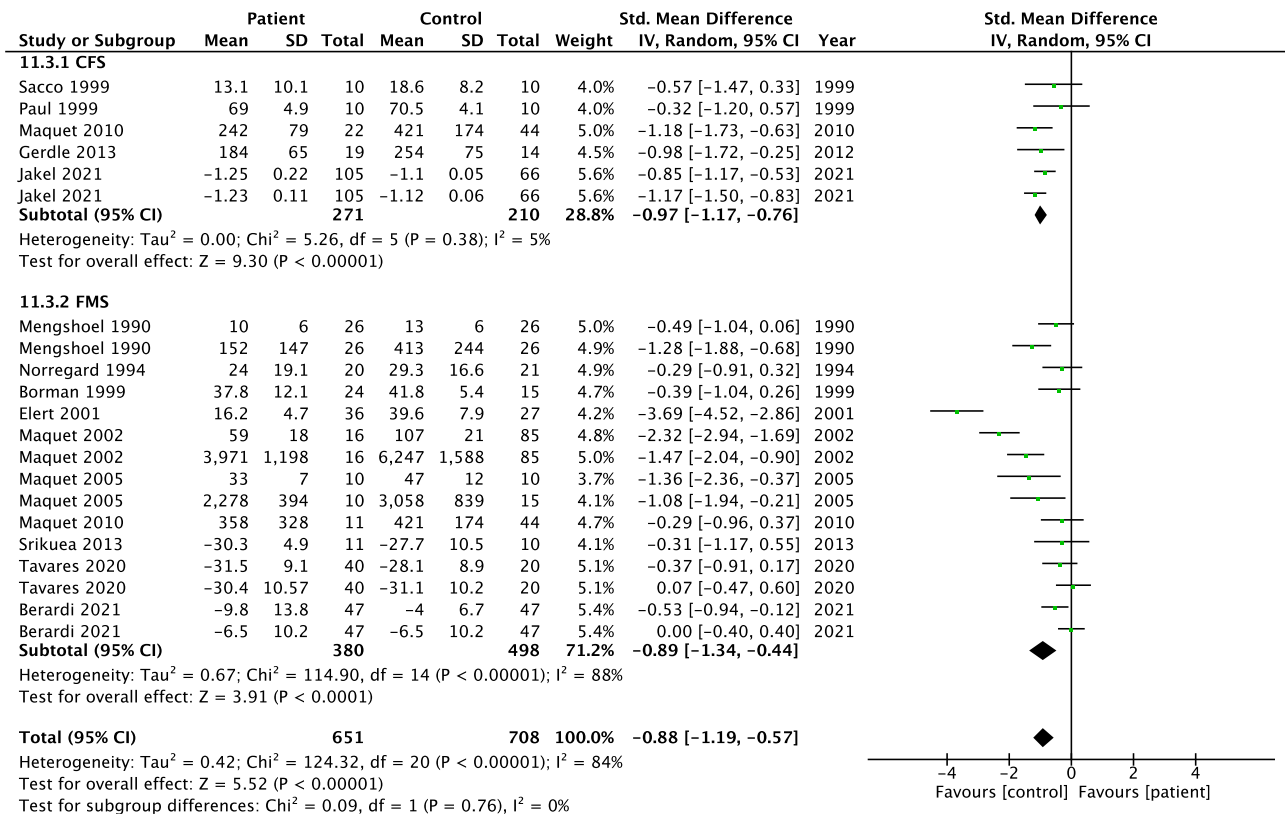

Figure G2. Fatigability values between CFS and FMS patients

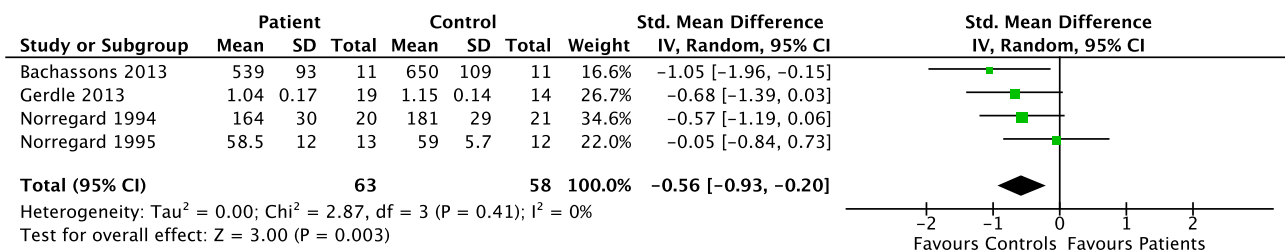

Figure H. Muscle Volume values for all studies included in the analysis.

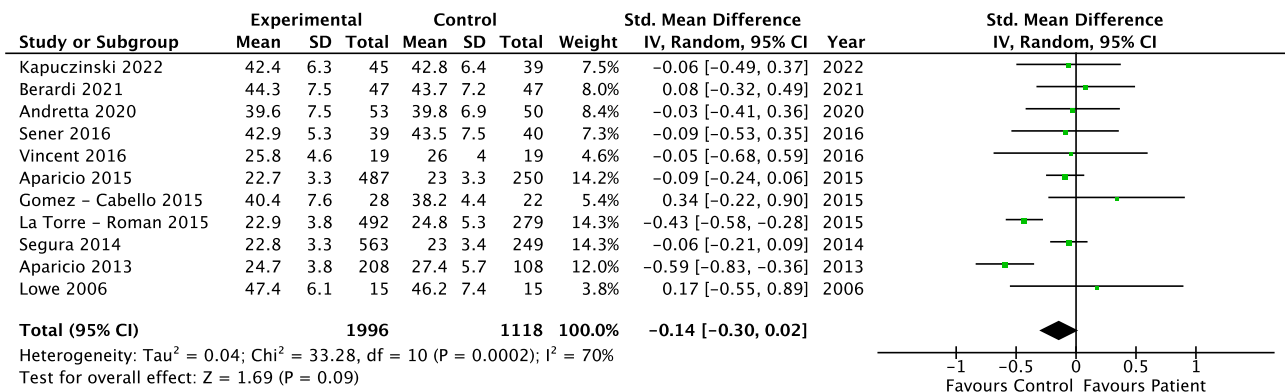

Figure I. Muscle Mass values for all studies included in the analysis.

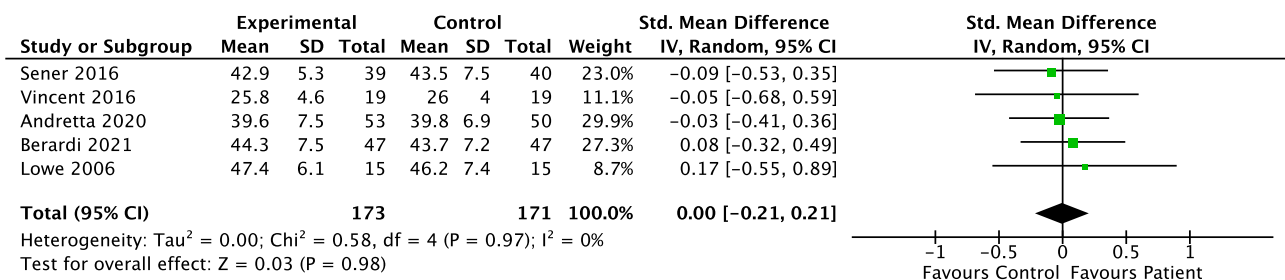

Figure I1. Muscle Mass values after sensitivity analysis for all studies included in the analysis.

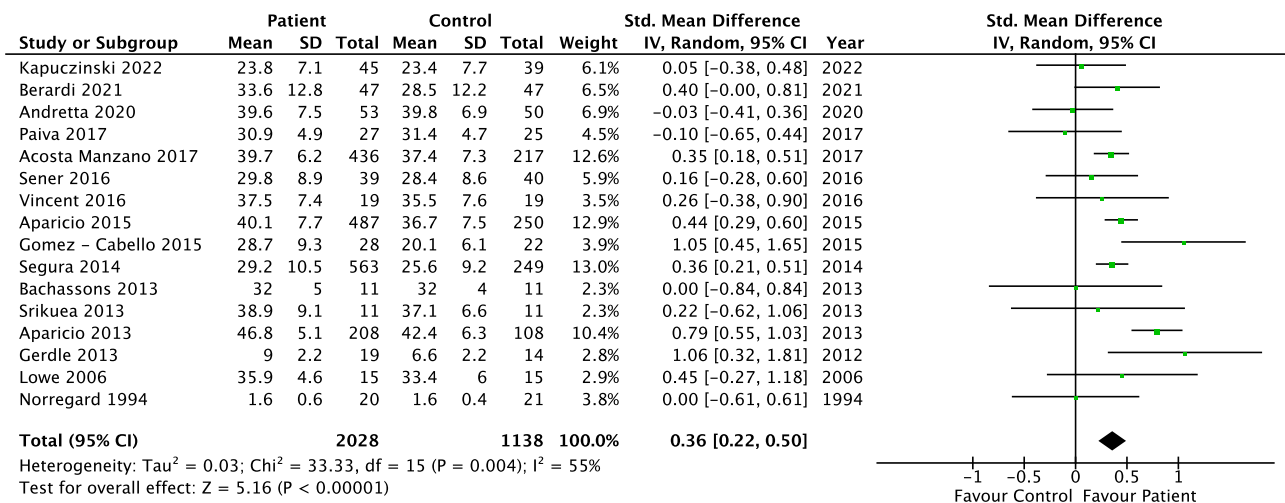

Figure L. Fat Mass values for all studies included in the analysis.

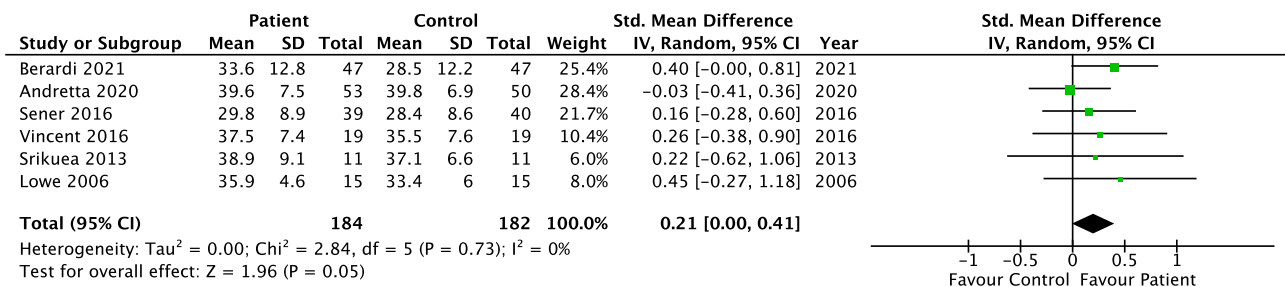

Figure L1. Fat Mass values for all studies after sensitivity analysis.

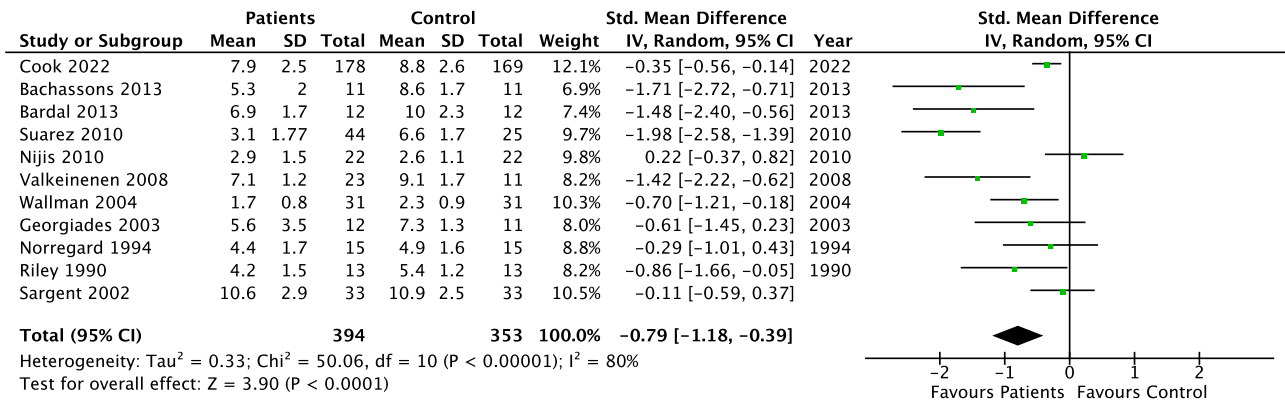

Figure M. Lactate values for all studies included in the analysis.

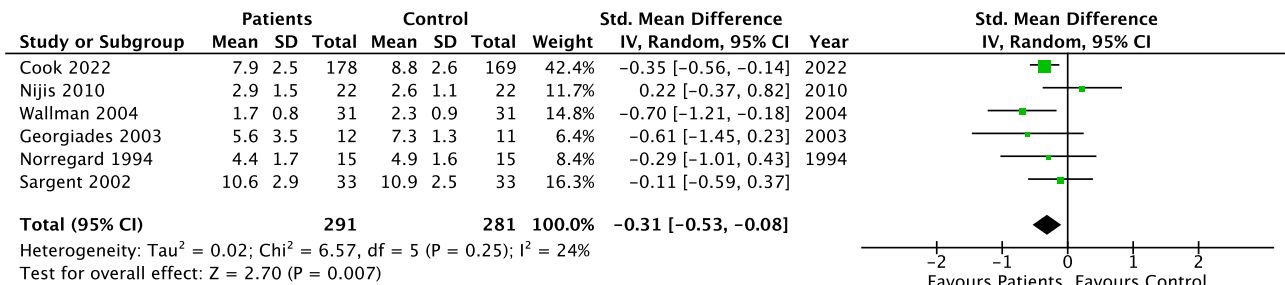

Figure M1. Lactate values for all studies after sensitivity analysis.

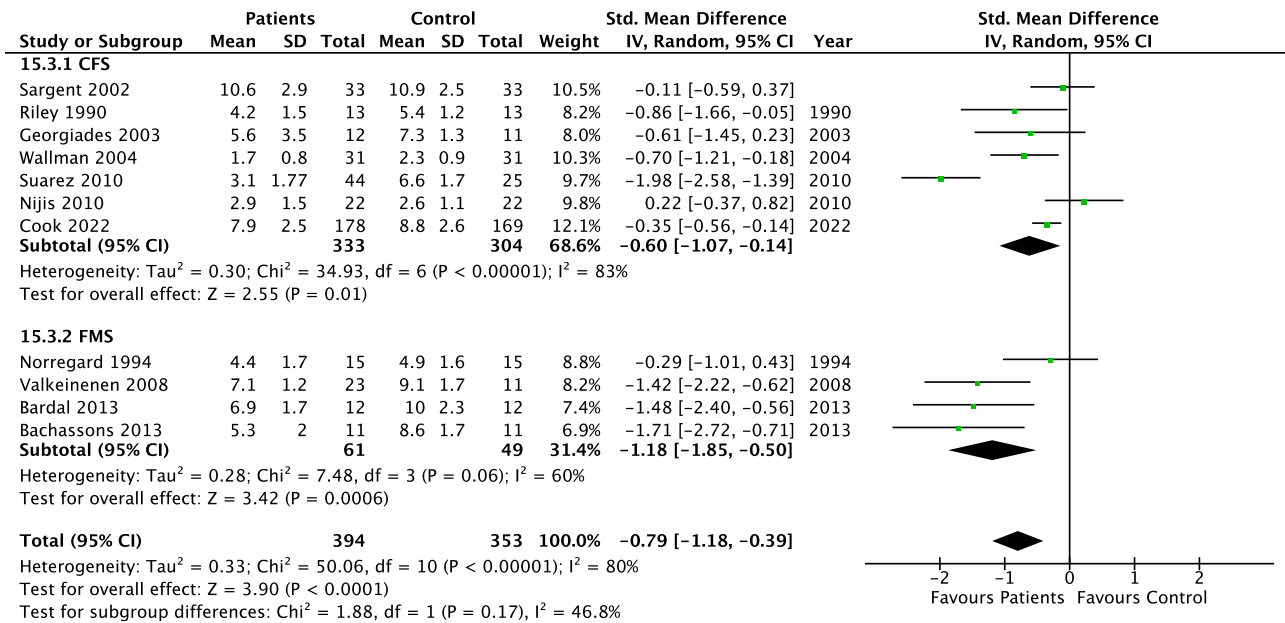

Figure M2. Lactate values in CFS and FMS patients



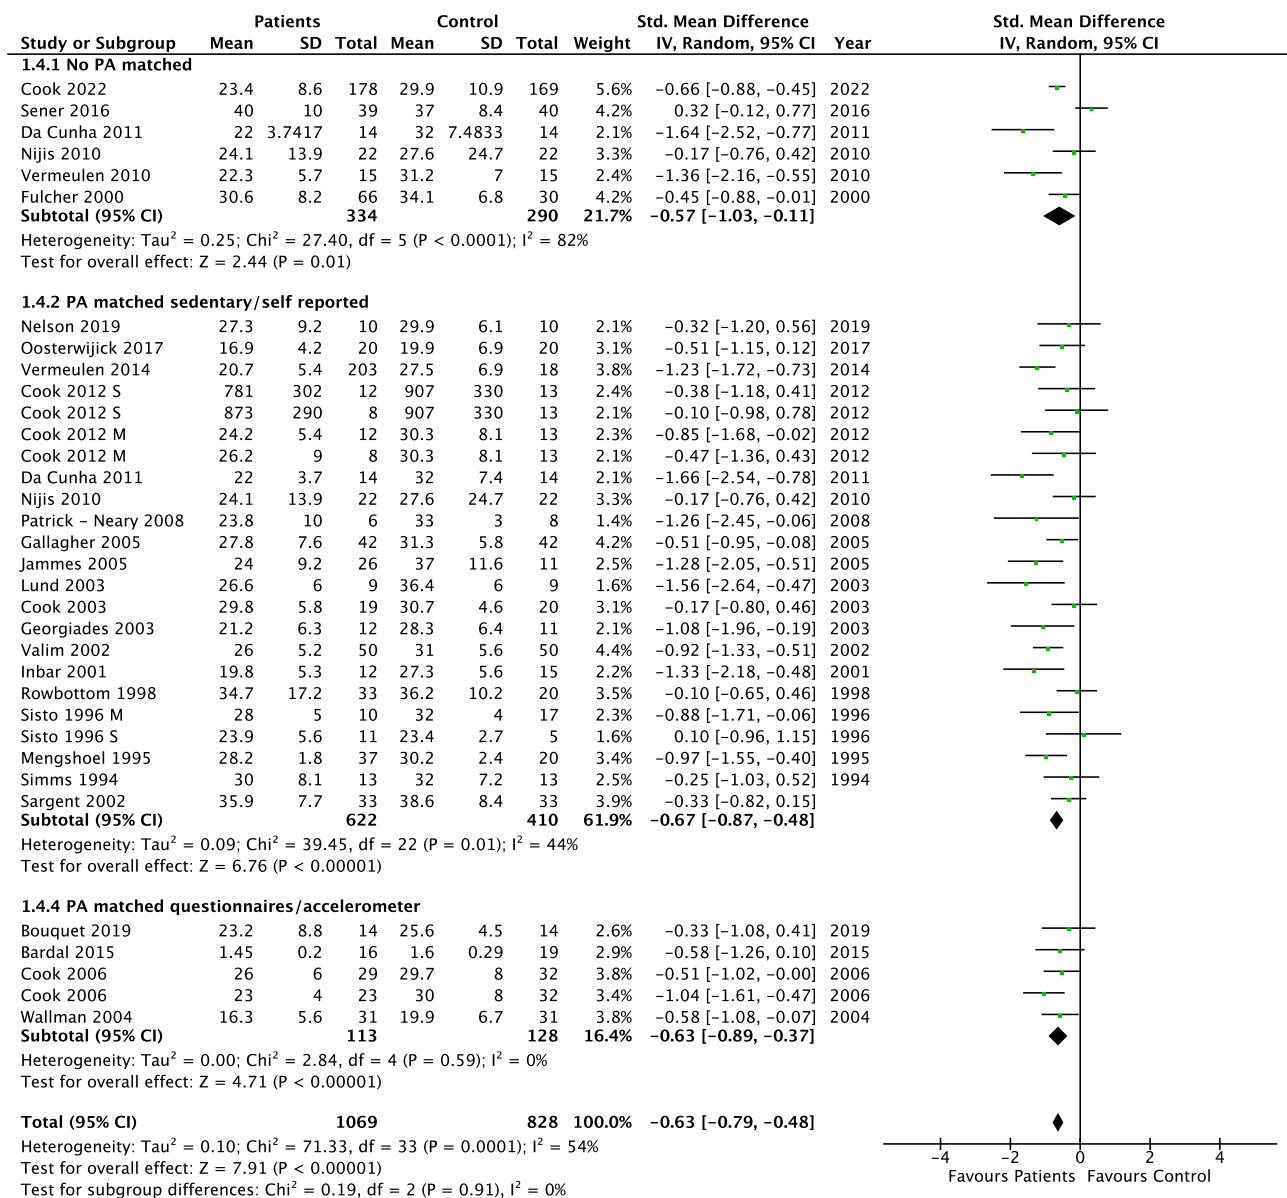

Figure N. Sensitivity analysis for low risk of bias studies based on matched physical activity levels (only VO2 Outcome)

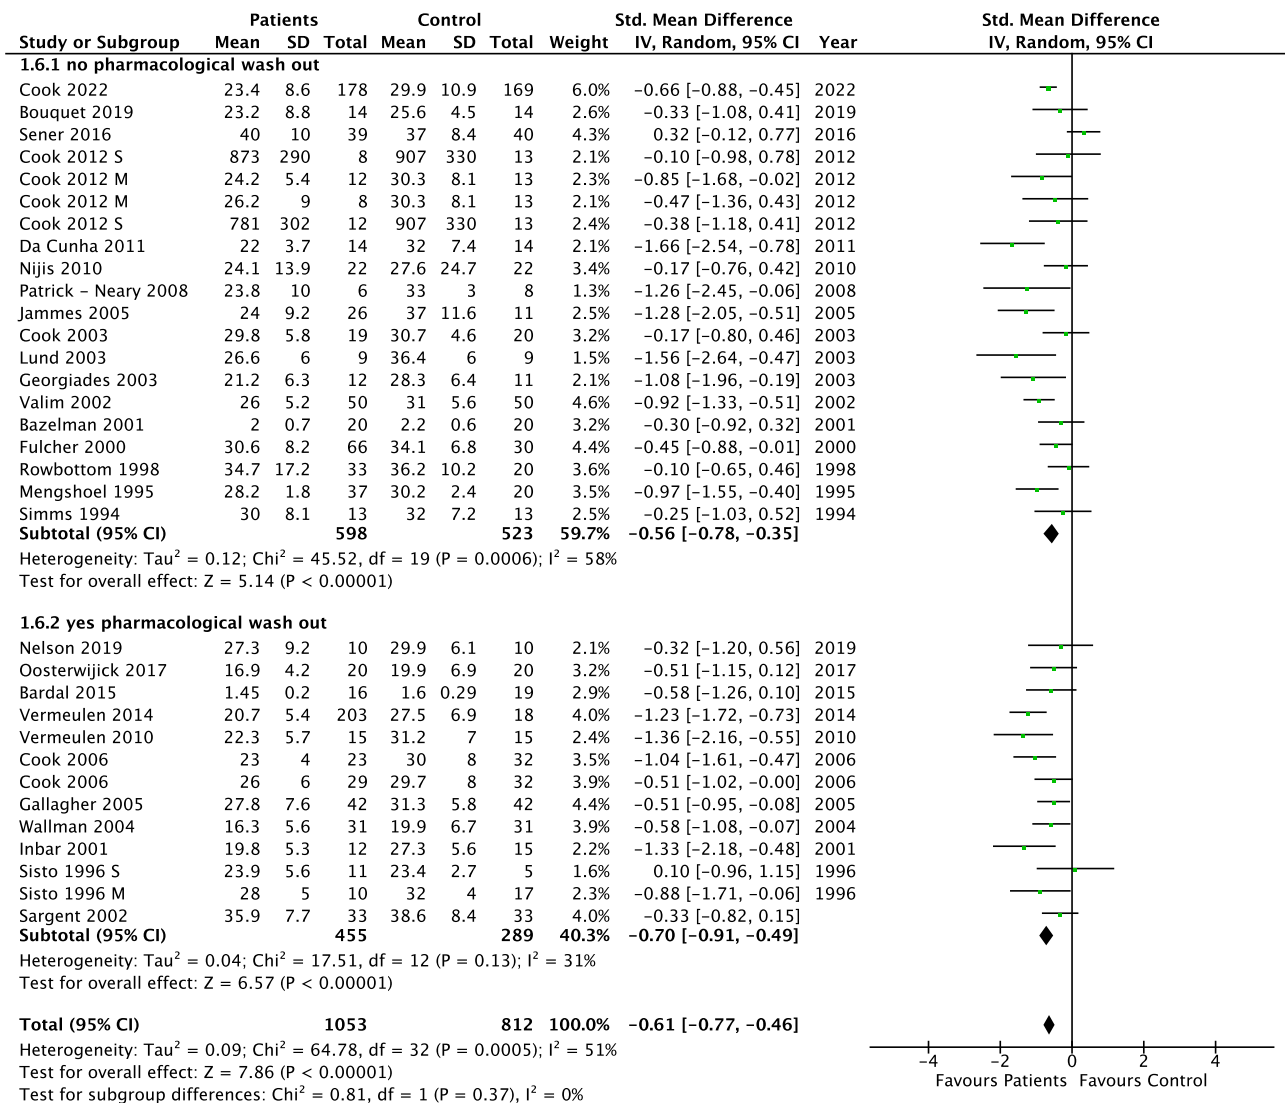

Figure 0. Sensitivity analysis for low risk of bias studies based on presence of pharmacological wash-out prior to the test levels (only VO2 outcome)

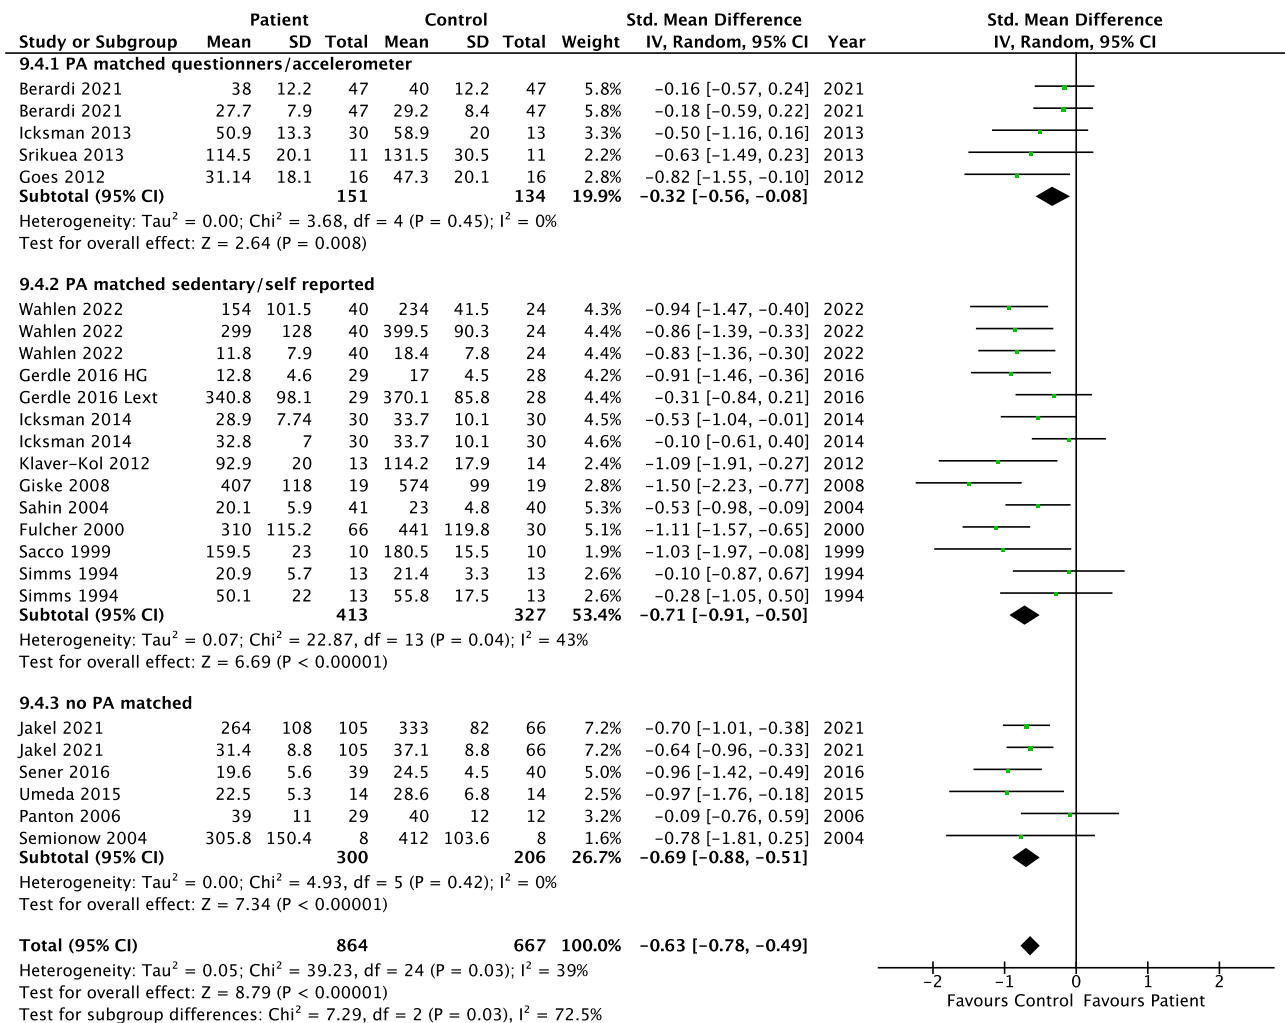

Figure P. Sub-group analysis for low risk of bias studies based on matched physical activity levels (only MVC Outcome)

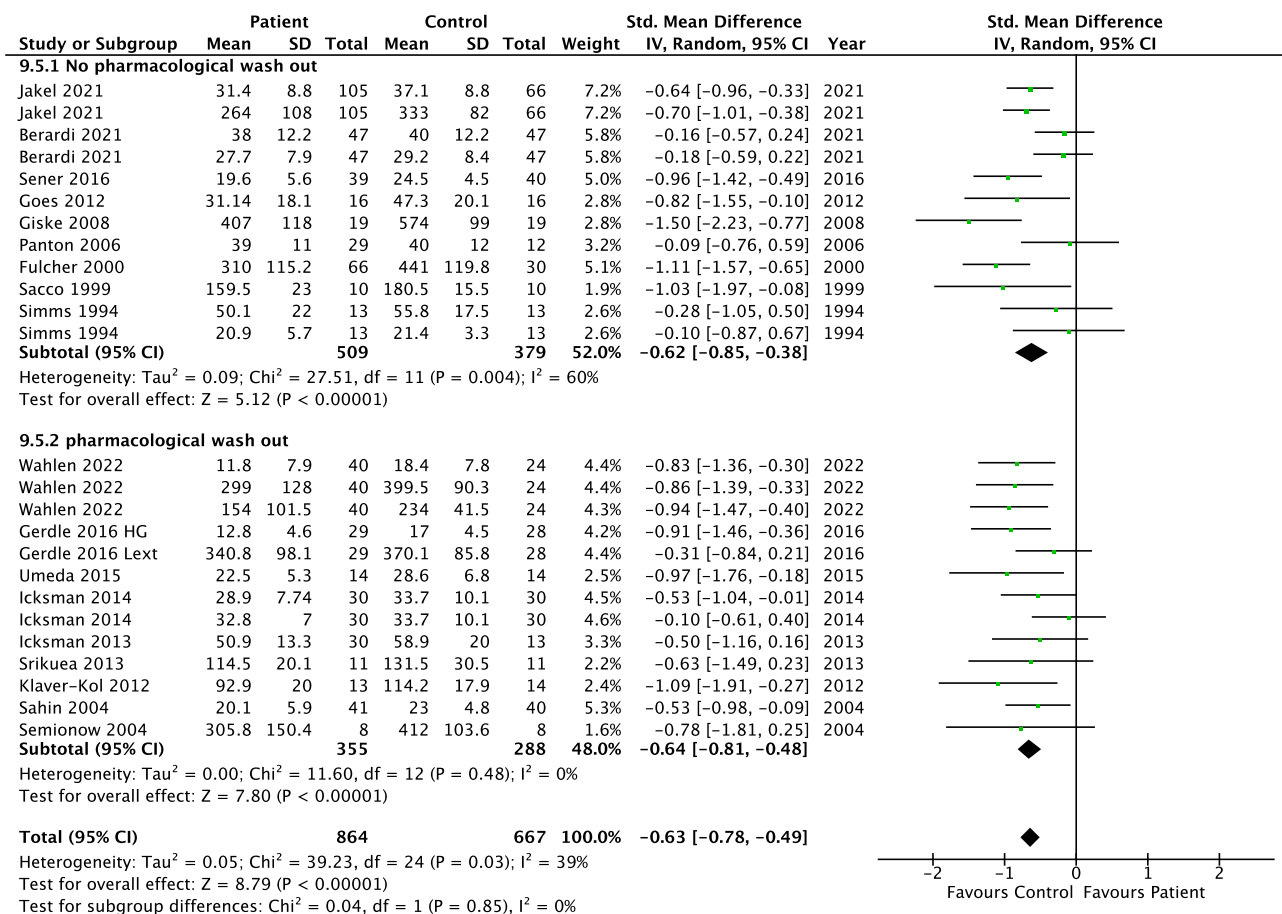

Figure Q. Sub-group analysis for low risk of bias studies based on presence of pharmacological wash-out prior to the test levels (only MVC outcome)
