# Supplementary material for: Fibromyalgia and Chronic Fatigue Syndromes: A systematic review and meta-analysis of cardiorespiratory fitness and neuromuscular function compared with healthy individuals
Source: PubMed Central journal article supplement (PMC9584387; doi:10.1371/journal.pone.0276009), 2022-10-20
Supplement: pone.0276009.s004.pdf [file pone.0276009.s004.pdf]

**Fibromyalgia and Chronic Fatigue Syndrome: a systematic review and meta-analysis of cardiorespiratory fitness and neuromuscular function.**

**Research term table**

**(FT= Full Text; MH= Mesh terms)**

| Search Term                                             | Field |
|---------------------------------------------------------|-------|
| Fibromyalgia                                            | MH    |
| Fatigue Syndrome, Chronic                               | MH    |
| Fibromyalgia                                            | FT    |
| Chronic Fatigue syndrome                                | FT    |
| Myalgic Encephalomyelitis                               | FT    |
| <b>All population combined with OR</b>                  |       |
| Exercise test                                           | MH    |
| Physical fitness                                        | FT    |
| Functional capacity                                     | FT    |
| Exercise performance *                                  | FT    |
| Aerobic power                                           | FT    |
| Peak power *                                            | FT    |
| Aerobic fitness                                         | FT    |
| Heart Rate *                                            | FT    |
| Aerobic assessment                                      | FT    |
| Oxygen uptake N2 maximum OR peak                        | FT    |
| Threshold N2 Anaerobic OR Ventilatory OR lactate        | FT    |
| Cardiorespiratory Fitness                               | FT    |
| Aerobic Capacity                                        | FT    |
| Lactate                                                 | FT    |
| Rate of perceived exertion OR RPE                       | FT    |
| <b>All Aerobic Assessment outcomes combined with OR</b> |       |
| Muscle strength                                         | MH    |
| Muscle strength dynamometer                             | MH    |
| Muscle strength                                         | FT    |
| Muscle strength dynamometer                             | FT    |
| Muscle Strength Assessment                              | FT    |
| Maximal Voluntary Contraction                           | FT    |
| Voluntary Activation                                    | FT    |
| Fatigability                                            | FT    |
| Endurance *                                             | FT    |
| Maximal strength                                        | FT    |
| Handgrip assessment                                     | FT    |
| Handgrip test                                           | FT    |
| Rate of Torque                                          | FT    |
| Peak Torque                                             | FT    |
| <b>All Strength outcomes combined with OR</b>           |       |
| Body composition                                        | MH    |
| Body Mass Index                                         | FT    |
| Muscle volume                                           | FT    |
| Muscle cross-sectional area                             | FT    |
| Mass N2 lean body OR free fat OR fat OR muscle          | FT    |
| <b>All body composition outcomes combined with OR</b>   |       |

|                                                               |  |
|---------------------------------------------------------------|--|
| ALL Outcomes combine with AND Fibromyalgia OR Chronic Fatigue |  |
|                                                               |  |

**FT= Full Text; MH= Mesh terms**

**Research strategy PUBMED.**

Search (((((((((((((((((((Exercise test[MeSH Terms]) OR Exercise test) OR Physical fitness) OR Functional capacity) OR Exercise performance \*) OR Aerobic power) OR Peak power \*) OR Aerobic fitness) OR Heart Rate \*) OR Aerobic assessment) OR ((Oxygen uptake N2 maximum OR peak))) OR ((Threshold N2 Anaerobic OR Ventilatory OR lactate))) OR Cardiorespiratory Fitness) OR Aerobic Capacity) OR Lactate) OR (Rate of perceived exertion OR RPE)))))) OR ((((((Body composition[MeSH Terms]) OR Body composition) OR Muscle volume) OR Muscle cross-sectional area) OR ((Mass N2 lean body OR free fat OR fat OR muscle)))) OR (((((((((((((((((((Muscle strength[MeSH Terms]) OR Muscle strength) OR Muscle strength dynamometer) OR Muscle strength dynamometer[MeSH Terms]) OR Muscle Strength Assessment) OR Maximal Voluntary Contraction) OR Voluntary Activation) OR Fatigability) OR Endurance \*) OR Maximal strength) OR Handgrip assessment) OR Handgrip test) OR Rate of Torque) OR Peak Torque)) AND ((((((fibromyalgia[MeSH Terms]) OR chronic fatigue syndrome) OR chronic fatigue syndrome[MeSH Terms]) OR fibromyalgia) OR Myalgic Encephalomyelitis) OR Myalgic Encephalomyelitis[MeSH Terms]) Sort by: Best Match

## Research strategy Cochrane (CENTRAL)

| ID  | Search Hits                                                                                                      |
|-----|------------------------------------------------------------------------------------------------------------------|
| #1  | MeSH descriptor: [Fibromyalgia] explode all trees                                                                |
| #2  | Fibromyalgia                                                                                                     |
| #3  | MeSH descriptor: [Fatigue Syndrome, Chronic] 4 tree(s) exploded                                                  |
| #4  | Chronic fatigue syndrome                                                                                         |
| #5  | Myalgic Encephalomyelitis                                                                                        |
| #6  | #1 OR #2 OR #3 OR #4 OR #5                                                                                       |
| #7  | MeSH descriptor: [Exercise Test] explode all trees                                                               |
| #8  | exercise test                                                                                                    |
| #9  | Physical fitness                                                                                                 |
| #10 | Functional capacity                                                                                              |
| #11 | Exercise performance                                                                                             |
| #12 | Aerobic power                                                                                                    |
| #13 | Peak power                                                                                                       |
| #14 | Aerobic fitness                                                                                                  |
| #15 | Heart Rate                                                                                                       |
| #16 | Aerobic assessment                                                                                               |
| #17 | Oxygen uptake N2 maximum OR peak                                                                                 |
| #18 | Threshold N2 Anaerobic OR Ventilatory OR lactate                                                                 |
| #19 | Cardiorespiratory Fitness                                                                                        |
| #20 | Aerobic Capacity                                                                                                 |
| #21 | Lactate                                                                                                          |
| #22 | Rate of perceived exertion OR RPE                                                                                |
| #23 | #7 OR #8 OR #9 OR #10 OR #11 OR #12 OR #13 OR #14 OR #15 OR #16 OR #17 OR #18 OR #19 OR #20 OR #20 OR #21 OR #22 |
| #24 | Muscle strength                                                                                                  |
| #25 | MeSH descriptor: [Muscle Strength] explode all trees                                                             |
| #26 | MeSH descriptor: [Muscle Strength Dynamometer] explode all trees                                                 |
| #27 | Muscle strength dynamometer                                                                                      |
| #28 | Muscle Strength Assessment                                                                                       |

- #29 Maximal Voluntary Contraction
- #30 Voluntary Activation
- #31 Fatigability
- #32 Endurance
- #33 Maximal strength
- #34 Handgrip assessment
- #35 Handgrip test
- #36 Rate of Torque
- #37 Peak Torque
- #38 #24 OR #25 OR #26 OR #27 OR #28 OR #29 OR #30 OR #31 OR #32 OR #33 OR #34 OR #35  
OR #36 OR #37 36590
- #39 Body composition
- #40 Body Mass Index
- #41 MeSH descriptor: [Body Composition] explode all trees
- #42 Muscle volume
- #43 Muscle cross-sectional area
- #44 Mass N2 lean body OR free fat OR fat OR muscle
- #45 #39 OR #40 OR #41 OR #42 OR #43 OR #44
- #46 #23 OR #38 OR #45
- #47 #6 AND #46

### **Research strategy PEDRO**

Research strategy for PEDRO was performed using only the following words: Fibromyalgia and Chronic fatigue Syndrome separately. The results thereafter were combined in Endnote and duplicates if present removed.

### **Research Strategy for EBSCOhost: Medline, AMED, CINAHL:**

The research strategy was performed through EBSCOhost database for Medline, AMED and CINAHL databases as reported in the following page (below).

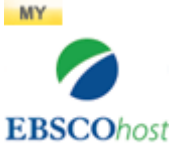

Monday, June 06, 2022 4:12:40 PM

| #    | Query                                                                                                                                                                                                             | Limiters/Expanders               | Last Run Via                                                                                                                                                               | Results |
|------|-------------------------------------------------------------------------------------------------------------------------------------------------------------------------------------------------------------------|----------------------------------|----------------------------------------------------------------------------------------------------------------------------------------------------------------------------|---------|
| S120 | S118 AND S119                                                                                                                                                                                                     | Search modes -<br>Boolean/Phrase | Interface - EBSCOhost<br>Research Databases<br>Search Screen - Advanced<br>Search<br>Database - AMED - The Allied<br>and Complementary Medicine<br>Database;CINAHL;MEDLINE | Display |
| S119 | S114 OR S115 OR S116                                                                                                                                                                                              | Search modes -<br>Boolean/Phrase | Interface - EBSCOhost<br>Research Databases<br>Search Screen - Advanced<br>Search<br>Database - AMED - The Allied<br>and Complementary Medicine<br>Database;CINAHL;MEDLINE | Display |
| S118 | S113 OR S117                                                                                                                                                                                                      | Search modes -<br>Boolean/Phrase | Interface - EBSCOhost<br>Research Databases<br>Search Screen - Advanced<br>Search<br>Database - AMED - The Allied<br>and Complementary Medicine<br>Database;CINAHL;MEDLINE | Display |
| S117 | myalgic<br>encephalomyelitis                                                                                                                                                                                      | Search modes -<br>Boolean/Phrase | Interface - EBSCOhost<br>Research Databases<br>Search Screen - Advanced<br>Search<br>Database - AMED - The Allied<br>and Complementary Medicine<br>Database;CINAHL;MEDLINE | Display |
| S116 | S63 OR S64 OR S65 OR<br>S66 OR S67 OR S68 OR<br>S69 OR S70 OR S71 OR<br>S72 OR S73 OR S74 OR<br>S75 OR S76 OR S77 OR<br>S78 OR S79 OR S80 OR<br>S81 OR S82 OR S83 OR<br>S84 OR S85 OR S86 OR<br>S87 OR S88 OR S89 | Search modes -<br>Boolean/Phrase | Interface - EBSCOhost<br>Research Databases<br>Search Screen - Advanced<br>Search<br>Database - AMED - The Allied<br>and Complementary Medicine<br>Database;CINAHL;MEDLINE | Display |
| S115 | S103 OR S104 OR S105                                                                                                                                                                                              | Search modes -                   | Interface - EBSCOhost                                                                                                                                                      | Display |

|      |                                                                                            |                               |                                                                                                      |         |
|------|--------------------------------------------------------------------------------------------|-------------------------------|------------------------------------------------------------------------------------------------------|---------|
|      | OR S106 OR S107 OR S108 OR S109 OR S110 OR S111                                            | Boolean/Phrase                | Research Databases<br>Search Screen - Advanced Search<br>Database - MEDLINE                          |         |
| S114 | S90 OR S91 OR S92 OR S93 OR S94 OR S95 OR S96 OR S97 OR S98 OR S99 OR S100 OR S101 OR S102 | Search modes - Boolean/Phrase | Interface - EBSCOhost<br>Research Databases<br>Search Screen - Advanced Search<br>Database - MEDLINE | Display |
| S113 | S61 OR S62 OR S112                                                                         | Search modes - Boolean/Phrase | Interface - EBSCOhost<br>Research Databases<br>Search Screen - Advanced Search<br>Database - MEDLINE | Display |
| S112 | TX chronic fatigue syndrome                                                                | Search modes - Boolean/Phrase | Interface - EBSCOhost<br>Research Databases<br>Search Screen - Advanced Search<br>Database - MEDLINE | Display |
| S111 | TX sarcopenia                                                                              | Search modes - Boolean/Phrase | Interface - EBSCOhost<br>Research Databases<br>Search Screen - Advanced Search<br>Database - MEDLINE | Display |
| S110 | TX muscle cross-sectional area                                                             | Search modes - Boolean/Phrase | Interface - EBSCOhost<br>Research Databases<br>Search Screen - Advanced Search<br>Database - MEDLINE | Display |
| S109 | TX Muscle volume                                                                           | Search modes - Boolean/Phrase | Interface - EBSCOhost<br>Research Databases<br>Search Screen - Advanced Search<br>Database - MEDLINE | Display |
| S108 | TX Muscle mass                                                                             | Search modes - Boolean/Phrase | Interface - EBSCOhost<br>Research Databases<br>Search Screen - Advanced Search<br>Database - MEDLINE | Display |
| S107 | TX fat mass                                                                                | Search modes - Boolean/Phrase | Interface - EBSCOhost<br>Research Databases<br>Search Screen - Advanced                              | Display |

|      |                        |                                  | Search<br>Database - MEDLINE                                                                            |         |
|------|------------------------|----------------------------------|---------------------------------------------------------------------------------------------------------|---------|
| S106 | TX Free fat mass       | Search modes -<br>Boolean/Phrase | Interface - EBSCOhost<br>Research Databases<br>Search Screen - Advanced<br>Search<br>Database - MEDLINE | Display |
| S105 | TX lean body mass      | Search modes -<br>Boolean/Phrase | Interface - EBSCOhost<br>Research Databases<br>Search Screen - Advanced<br>Search<br>Database - MEDLINE | Display |
| S104 | TX body composition    | Search modes -<br>Boolean/Phrase | Interface - EBSCOhost<br>Research Databases<br>Search Screen - Advanced<br>Search<br>Database - MEDLINE | Display |
| S103 | MH body composition    | Search modes -<br>Boolean/Phrase | Interface - EBSCOhost<br>Research Databases<br>Search Screen - Advanced<br>Search<br>Database - MEDLINE | Display |
| S102 | TX handgrip            | Search modes -<br>Boolean/Phrase | Interface - EBSCOhost<br>Research Databases<br>Search Screen - Advanced<br>Search<br>Database - MEDLINE | Display |
| S101 | TX Handgrip test       | Search modes -<br>Boolean/Phrase | Interface - EBSCOhost<br>Research Databases<br>Search Screen - Advanced<br>Search<br>Database - MEDLINE | Display |
| S100 | TX Handgrip assessment | Search modes -<br>Boolean/Phrase | Interface - EBSCOhost<br>Research Databases<br>Search Screen - Advanced<br>Search<br>Database - MEDLINE | Display |
| S99  | TX Maximal strength    | Search modes -<br>Boolean/Phrase | Interface - EBSCOhost<br>Research Databases<br>Search Screen - Advanced<br>Search<br>Database - MEDLINE | Display |

|     |                                     |                                  |                                                                                                         |         |
|-----|-------------------------------------|----------------------------------|---------------------------------------------------------------------------------------------------------|---------|
| S98 | TX Knee contraction                 | Search modes -<br>Boolean/Phrase | Interface - EBSCOhost<br>Research Databases<br>Search Screen - Advanced<br>Search<br>Database - MEDLINE | Display |
| S97 | TX Knee maximal<br>contraction      | Search modes -<br>Boolean/Phrase | Interface - EBSCOhost<br>Research Databases<br>Search Screen - Advanced<br>Search<br>Database - MEDLINE | Display |
| S96 | TX Maximal isometric<br>contraction | Search modes -<br>Boolean/Phrase | Interface - EBSCOhost<br>Research Databases<br>Search Screen - Advanced<br>Search<br>Database - MEDLINE | Display |
| S95 | TX Isometric contraction            | Search modes -<br>Boolean/Phrase | Interface - EBSCOhost<br>Research Databases<br>Search Screen - Advanced<br>Search<br>Database - MEDLINE | Display |
| S94 | TX Maximum voluntary<br>contraction | Search modes -<br>Boolean/Phrase | Interface - EBSCOhost<br>Research Databases<br>Search Screen - Advanced<br>Search<br>Database - MEDLINE | Display |
| S93 | MH Muscle strength                  | Search modes -<br>Boolean/Phrase | Interface - EBSCOhost<br>Research Databases<br>Search Screen - Advanced<br>Search<br>Database - MEDLINE | Display |
| S92 | MH Muscle strength<br>dynamometer   | Search modes -<br>Boolean/Phrase | Interface - EBSCOhost<br>Research Databases<br>Search Screen - Advanced<br>Search<br>Database - MEDLINE | Display |
| S91 | Muscle strength<br>dynamometer      | Search modes -<br>Boolean/Phrase | Interface - EBSCOhost<br>Research Databases<br>Search Screen - Advanced<br>Search<br>Database - MEDLINE | Display |
| S90 | Muscle strength                     | Search modes -<br>Boolean/Phrase | Interface - EBSCOhost<br>Research Databases<br>Search Screen - Advanced                                 | Display |



|     |                                 |                                  | Search<br>Database - MEDLINE                                                                            |         |
|-----|---------------------------------|----------------------------------|---------------------------------------------------------------------------------------------------------|---------|
| S89 | TX fitness test                 | Search modes -<br>Boolean/Phrase | Interface - EBSCOhost<br>Research Databases<br>Search Screen - Advanced<br>Search<br>Database - MEDLINE | Display |
| S88 | TX lactate                      | Search modes -<br>Boolean/Phrase | Interface - EBSCOhost<br>Research Databases<br>Search Screen - Advanced<br>Search<br>Database - MEDLINE | Display |
| S87 | TX lactate threshold            | Search modes -<br>Boolean/Phrase | Interface - EBSCOhost<br>Research Databases<br>Search Screen - Advanced<br>Search<br>Database - MEDLINE | Display |
| S86 | TX Maximal test                 | Search modes -<br>Boolean/Phrase | Interface - EBSCOhost<br>Research Databases<br>Search Screen - Advanced<br>Search<br>Database - MEDLINE | Display |
| S85 | TX Submaximal test              | Search modes -<br>Boolean/Phrase | Interface - EBSCOhost<br>Research Databases<br>Search Screen - Advanced<br>Search<br>Database - MEDLINE | Display |
| S84 | TX Aerobic Capacity             | Search modes -<br>Boolean/Phrase | Interface - EBSCOhost<br>Research Databases<br>Search Screen - Advanced<br>Search<br>Database - MEDLINE | Display |
| S83 | TX Cardiorespiratory<br>Fitness | Search modes -<br>Boolean/Phrase | Interface - EBSCOhost<br>Research Databases<br>Search Screen - Advanced<br>Search<br>Database - MEDLINE | Display |
| S82 | TX Ventilatory Threshold        | Search modes -<br>Boolean/Phrase | Interface - EBSCOhost<br>Research Databases<br>Search Screen - Advanced<br>Search<br>Database - MEDLINE | Display |

|     |                          |                               |                                                                                                      |         |
|-----|--------------------------|-------------------------------|------------------------------------------------------------------------------------------------------|---------|
| S81 | TX maximum oxygen uptake | Search modes - Boolean/Phrase | Interface - EBSCOhost<br>Research Databases<br>Search Screen - Advanced Search<br>Database - MEDLINE | Display |
| S80 | TX anaerobic threshold   | Search modes - Boolean/Phrase | Interface - EBSCOhost<br>Research Databases<br>Search Screen - Advanced Search<br>Database - MEDLINE | Display |
| S79 | TX maximum oxygen uptake | Search modes - Boolean/Phrase | Interface - EBSCOhost<br>Research Databases<br>Search Screen - Advanced Search<br>Database - MEDLINE | Display |
| S78 | TX Peak oxygen uptake    | Search modes - Boolean/Phrase | Interface - EBSCOhost<br>Research Databases<br>Search Screen - Advanced Search<br>Database - MEDLINE | Display |
| S77 | TX Aerobic assessment    | Search modes - Boolean/Phrase | Interface - EBSCOhost<br>Research Databases<br>Search Screen - Advanced Search<br>Database - MEDLINE | Display |
| S76 | TX Aerobic Test          | Search modes - Boolean/Phrase | Interface - EBSCOhost<br>Research Databases<br>Search Screen - Advanced Search<br>Database - MEDLINE | Display |
| S75 | TX Incremental test      | Search modes - Boolean/Phrase | Interface - EBSCOhost<br>Research Databases<br>Search Screen - Advanced Search<br>Database - MEDLINE | Display |
| S74 | TX maximum heart rate    | Search modes - Boolean/Phrase | Interface - EBSCOhost<br>Research Databases<br>Search Screen - Advanced Search<br>Database - MEDLINE | Display |
| S73 | TX Heart Rate            | Search modes - Boolean/Phrase | Interface - EBSCOhost<br>Research Databases<br>Search Screen - Advanced                              | Display |

|     |                           |                                  | Search<br>Database - MEDLINE                                                                            |         |
|-----|---------------------------|----------------------------------|---------------------------------------------------------------------------------------------------------|---------|
| S72 | TX Aerobic fitness        | Search modes -<br>Boolean/Phrase | Interface - EBSCOhost<br>Research Databases<br>Search Screen - Advanced<br>Search<br>Database - MEDLINE | Display |
| S71 | TX peak power             | Search modes -<br>Boolean/Phrase | Interface - EBSCOhost<br>Research Databases<br>Search Screen - Advanced<br>Search<br>Database - MEDLINE | Display |
| S70 | TX Aerobic power          | Search modes -<br>Boolean/Phrase | Interface - EBSCOhost<br>Research Databases<br>Search Screen - Advanced<br>Search<br>Database - MEDLINE | Display |
| S69 | TX Exercise performance   | Search modes -<br>Boolean/Phrase | Interface - EBSCOhost<br>Research Databases<br>Search Screen - Advanced<br>Search<br>Database - MEDLINE | Display |
| S68 | TX functional capacity    | Search modes -<br>Boolean/Phrase | Interface - EBSCOhost<br>Research Databases<br>Search Screen - Advanced<br>Search<br>Database - MEDLINE | Display |
| S67 | TX Cardiorespiratory      | Search modes -<br>Boolean/Phrase | Interface - EBSCOhost<br>Research Databases<br>Search Screen - Advanced<br>Search<br>Database - MEDLINE | Display |
| S66 | TX physical fitness       | Search modes -<br>Boolean/Phrase | Interface - EBSCOhost<br>Research Databases<br>Search Screen - Advanced<br>Search<br>Database - MEDLINE | Display |
| S65 | TX Cardiorespiratory test | Search modes -<br>Boolean/Phrase | Interface - EBSCOhost<br>Research Databases<br>Search Screen - Advanced<br>Search<br>Database - MEDLINE | Display |

|     |                                                |                               |                                                                                                                                                                   |         |
|-----|------------------------------------------------|-------------------------------|-------------------------------------------------------------------------------------------------------------------------------------------------------------------|---------|
| S64 | TX cardiopulmonary exercise test               | Search modes - Boolean/Phrase | Interface - EBSCOhost<br>Research Databases<br>Search Screen - Advanced Search<br>Database - MEDLINE                                                              | Display |
| S63 | MH exercise test                               | Search modes - Boolean/Phrase | Interface - EBSCOhost<br>Research Databases<br>Search Screen - Advanced Search<br>Database - MEDLINE                                                              | Display |
| S62 | MH fibromyalgia OR MH chronic fatigue syndrome | Search modes - Boolean/Phrase | Interface - EBSCOhost<br>Research Databases<br>Search Screen - Advanced Search<br>Database - MEDLINE                                                              | Display |
| S61 | TX fibromyalgia                                | Search modes - Boolean/Phrase | Interface - EBSCOhost<br>Research Databases<br>Search Screen - Advanced Search<br>Database - MEDLINE                                                              | Display |
| S60 | S58 AND S59                                    | Search modes - Boolean/Phrase | Interface - EBSCOhost<br>Research Databases<br>Search Screen - Advanced Search<br>Database - AMED - The Allied and Complementary Medicine Database;CINAHL;MEDLINE | Display |
| S59 | S54 OR S55 OR S56                              | Search modes - Boolean/Phrase | Interface - EBSCOhost<br>Research Databases<br>Search Screen - Advanced Search<br>Database - AMED - The Allied and Complementary Medicine Database;CINAHL;MEDLINE | Display |
| S58 | S53 OR S57                                     | Search modes - Boolean/Phrase | Interface - EBSCOhost<br>Research Databases<br>Search Screen - Advanced Search<br>Database - AMED - The Allied and Complementary Medicine Database;CINAHL;MEDLINE | Display |
| S57 | myalgic encephalomyelitis                      | Search modes - Boolean/Phrase | Interface - EBSCOhost<br>Research Databases                                                                                                                       | Display |

|     |                                                                                                                                                                                    |                               |                                                                                                                                                          |         |
|-----|------------------------------------------------------------------------------------------------------------------------------------------------------------------------------------|-------------------------------|----------------------------------------------------------------------------------------------------------------------------------------------------------|---------|
|     |                                                                                                                                                                                    |                               | Search Screen - Advanced Search                                                                                                                          |         |
|     |                                                                                                                                                                                    |                               | Database - AMED - The Allied and Complementary Medicine Database;CINAHL;MEDLINE                                                                          |         |
| S56 | S3 OR S4 OR S5 OR S6 OR S7 OR S8 OR S9 OR S10 OR S11 OR S12 OR S13 OR S14 OR S15 OR S16 OR S17 OR S18 OR S19 OR S20 OR S21 OR S22 OR S23 OR S24 OR S25 OR S26 OR S27 OR S28 OR S29 | Search modes - Boolean/Phrase | Interface - EBSCOhost Research Databases Search Screen - Advanced Search Database - AMED - The Allied and Complementary Medicine Database;CINAHL;MEDLINE | Display |
| S55 | S43 OR S44 OR S45 OR S46 OR S47 OR S48 OR S49 OR S50 OR S51                                                                                                                        | Search modes - Boolean/Phrase | Interface - EBSCOhost Research Databases Search Screen - Advanced Search Database - MEDLINE                                                              | Display |
| S54 | S30 OR S31 OR S32 OR S33 OR S34 OR S35 OR S36 OR S37 OR S38 OR S39 OR S40 OR S41 OR S42                                                                                            | Search modes - Boolean/Phrase | Interface - EBSCOhost Research Databases Search Screen - Advanced Search Database - MEDLINE                                                              | Display |
| S53 | S1 OR S2 OR S52                                                                                                                                                                    | Search modes - Boolean/Phrase | Interface - EBSCOhost Research Databases Search Screen - Advanced Search Database - MEDLINE                                                              | Display |
| S52 | TX chronic fatigue syndrome                                                                                                                                                        | Search modes - Boolean/Phrase | Interface - EBSCOhost Research Databases Search Screen - Advanced Search Database - MEDLINE                                                              | Display |
| S51 | TX sarcopenia                                                                                                                                                                      | Search modes - Boolean/Phrase | Interface - EBSCOhost Research Databases Search Screen - Advanced Search Database - MEDLINE                                                              | Display |
| S50 | TX muscle cross-sectional area                                                                                                                                                     | Search modes - Boolean/Phrase | Interface - EBSCOhost Research Databases Search Screen - Advanced                                                                                        | Display |

|     |                     |                                  | Search<br>Database - MEDLINE                                                                            |         |
|-----|---------------------|----------------------------------|---------------------------------------------------------------------------------------------------------|---------|
| S49 | TX Muscle volume    | Search modes -<br>Boolean/Phrase | Interface - EBSCOhost<br>Research Databases<br>Search Screen - Advanced<br>Search<br>Database - MEDLINE | Display |
| S48 | TX Muscle mass      | Search modes -<br>Boolean/Phrase | Interface - EBSCOhost<br>Research Databases<br>Search Screen - Advanced<br>Search<br>Database - MEDLINE | Display |
| S47 | TX fat mass         | Search modes -<br>Boolean/Phrase | Interface - EBSCOhost<br>Research Databases<br>Search Screen - Advanced<br>Search<br>Database - MEDLINE | Display |
| S46 | TX Free fat mass    | Search modes -<br>Boolean/Phrase | Interface - EBSCOhost<br>Research Databases<br>Search Screen - Advanced<br>Search<br>Database - MEDLINE | Display |
| S45 | TX lean body mass   | Search modes -<br>Boolean/Phrase | Interface - EBSCOhost<br>Research Databases<br>Search Screen - Advanced<br>Search<br>Database - MEDLINE | Display |
| S44 | TX body composition | Search modes -<br>Boolean/Phrase | Interface - EBSCOhost<br>Research Databases<br>Search Screen - Advanced<br>Search<br>Database - MEDLINE | Display |
| S43 | MH body composition | Search modes -<br>Boolean/Phrase | Interface - EBSCOhost<br>Research Databases<br>Search Screen - Advanced<br>Search<br>Database - MEDLINE | Display |
| S42 | TX handgrip         | Search modes -<br>Boolean/Phrase | Interface - EBSCOhost<br>Research Databases<br>Search Screen - Advanced<br>Search<br>Database - MEDLINE | Display |

|     |                                     |                                  |                                                                                                         |         |
|-----|-------------------------------------|----------------------------------|---------------------------------------------------------------------------------------------------------|---------|
| S41 | TX Handgrip test                    | Search modes -<br>Boolean/Phrase | Interface - EBSCOhost<br>Research Databases<br>Search Screen - Advanced<br>Search<br>Database - MEDLINE | Display |
| S40 | TX Handgrip assessment              | Search modes -<br>Boolean/Phrase | Interface - EBSCOhost<br>Research Databases<br>Search Screen - Advanced<br>Search<br>Database - MEDLINE | Display |
| S39 | TX Maximal strength                 | Search modes -<br>Boolean/Phrase | Interface - EBSCOhost<br>Research Databases<br>Search Screen - Advanced<br>Search<br>Database - MEDLINE | Display |
| S38 | TX Knee contraction                 | Search modes -<br>Boolean/Phrase | Interface - EBSCOhost<br>Research Databases<br>Search Screen - Advanced<br>Search<br>Database - MEDLINE | Display |
| S37 | TX Knee maximal<br>contraction      | Search modes -<br>Boolean/Phrase | Interface - EBSCOhost<br>Research Databases<br>Search Screen - Advanced<br>Search<br>Database - MEDLINE | Display |
| S36 | TX Maximal isometric<br>contraction | Search modes -<br>Boolean/Phrase | Interface - EBSCOhost<br>Research Databases<br>Search Screen - Advanced<br>Search<br>Database - MEDLINE | Display |
| S35 | TX Isometric contraction            | Search modes -<br>Boolean/Phrase | Interface - EBSCOhost<br>Research Databases<br>Search Screen - Advanced<br>Search<br>Database - MEDLINE | Display |
| S34 | TX Maximum voluntary<br>contraction | Search modes -<br>Boolean/Phrase | Interface - EBSCOhost<br>Research Databases<br>Search Screen - Advanced<br>Search<br>Database - MEDLINE | Display |
| S33 | MH Muscle strength                  | Search modes -<br>Boolean/Phrase | Interface - EBSCOhost<br>Research Databases<br>Search Screen - Advanced                                 | Display |

|     |                                |                               | Search<br>Database - MEDLINE                                                                         |         |
|-----|--------------------------------|-------------------------------|------------------------------------------------------------------------------------------------------|---------|
| S32 | MH Muscle strength dynamometer | Search modes - Boolean/Phrase | Interface - EBSCOhost<br>Research Databases<br>Search Screen - Advanced Search<br>Database - MEDLINE | Display |
| S31 | Muscle strength dynamometer    | Search modes - Boolean/Phrase | Interface - EBSCOhost<br>Research Databases<br>Search Screen - Advanced Search<br>Database - MEDLINE | Display |
| S30 | Muscle strength                | Search modes - Boolean/Phrase | Interface - EBSCOhost<br>Research Databases<br>Search Screen - Advanced Search<br>Database - MEDLINE | Display |
| S29 | TX fitness test                | Search modes - Boolean/Phrase | Interface - EBSCOhost<br>Research Databases<br>Search Screen - Advanced Search<br>Database - MEDLINE | Display |
| S28 | TX lactate                     | Search modes - Boolean/Phrase | Interface - EBSCOhost<br>Research Databases<br>Search Screen - Advanced Search<br>Database - MEDLINE | Display |
| S27 | TX lactate threshold           | Search modes - Boolean/Phrase | Interface - EBSCOhost<br>Research Databases<br>Search Screen - Advanced Search<br>Database - MEDLINE | Display |
| S26 | TX Maximal test                | Search modes - Boolean/Phrase | Interface - EBSCOhost<br>Research Databases<br>Search Screen - Advanced Search<br>Database - MEDLINE | Display |
| S25 | TX Submaximal test             | Search modes - Boolean/Phrase | Interface - EBSCOhost<br>Research Databases<br>Search Screen - Advanced Search<br>Database - MEDLINE | Display |



|     |                                 |                                  |                                                                                                         |         |
|-----|---------------------------------|----------------------------------|---------------------------------------------------------------------------------------------------------|---------|
| S24 | TX Aerobic Capacity             | Search modes -<br>Boolean/Phrase | Interface - EBSCOhost<br>Research Databases<br>Search Screen - Advanced<br>Search<br>Database - MEDLINE | Display |
| S23 | TX Cardiorespiratory<br>Fitness | Search modes -<br>Boolean/Phrase | Interface - EBSCOhost<br>Research Databases<br>Search Screen - Advanced<br>Search<br>Database - MEDLINE | Display |
| S22 | TX Ventilatory Threshold        | Search modes -<br>Boolean/Phrase | Interface - EBSCOhost<br>Research Databases<br>Search Screen - Advanced<br>Search<br>Database - MEDLINE | Display |
| S21 | TX maximum oxygen<br>uptake     | Search modes -<br>Boolean/Phrase | Interface - EBSCOhost<br>Research Databases<br>Search Screen - Advanced<br>Search<br>Database - MEDLINE | Display |
| S20 | TX anaerobic threshold          | Search modes -<br>Boolean/Phrase | Interface - EBSCOhost<br>Research Databases<br>Search Screen - Advanced<br>Search<br>Database - MEDLINE | Display |
| S19 | TX maximum oxygen<br>uptake     | Search modes -<br>Boolean/Phrase | Interface - EBSCOhost<br>Research Databases<br>Search Screen - Advanced<br>Search<br>Database - MEDLINE | Display |
| S18 | TX Peak oxygen uptake           | Search modes -<br>Boolean/Phrase | Interface - EBSCOhost<br>Research Databases<br>Search Screen - Advanced<br>Search<br>Database - MEDLINE | Display |
| S17 | TX Aerobic assessment           | Search modes -<br>Boolean/Phrase | Interface - EBSCOhost<br>Research Databases<br>Search Screen - Advanced<br>Search<br>Database - MEDLINE | Display |
| S16 | TX Aerobic Test                 | Search modes -<br>Boolean/Phrase | Interface - EBSCOhost<br>Research Databases<br>Search Screen - Advanced                                 | Display |

|     |                         |                                  | Search<br>Database - MEDLINE                                                                            |         |
|-----|-------------------------|----------------------------------|---------------------------------------------------------------------------------------------------------|---------|
| S15 | TX Incremental test     | Search modes -<br>Boolean/Phrase | Interface - EBSCOhost<br>Research Databases<br>Search Screen - Advanced<br>Search<br>Database - MEDLINE | Display |
| S14 | TX maximum heart rate   | Search modes -<br>Boolean/Phrase | Interface - EBSCOhost<br>Research Databases<br>Search Screen - Advanced<br>Search<br>Database - MEDLINE | Display |
| S13 | TX Heart Rate           | Search modes -<br>Boolean/Phrase | Interface - EBSCOhost<br>Research Databases<br>Search Screen - Advanced<br>Search<br>Database - MEDLINE | Display |
| S12 | TX Aerobic fitness      | Search modes -<br>Boolean/Phrase | Interface - EBSCOhost<br>Research Databases<br>Search Screen - Advanced<br>Search<br>Database - MEDLINE | Display |
| S11 | TX peak power           | Search modes -<br>Boolean/Phrase | Interface - EBSCOhost<br>Research Databases<br>Search Screen - Advanced<br>Search<br>Database - MEDLINE | Display |
| S10 | TX Aerobic power        | Search modes -<br>Boolean/Phrase | Interface - EBSCOhost<br>Research Databases<br>Search Screen - Advanced<br>Search<br>Database - MEDLINE | Display |
| S9  | TX Exercise performance | Search modes -<br>Boolean/Phrase | Interface - EBSCOhost<br>Research Databases<br>Search Screen - Advanced<br>Search<br>Database - MEDLINE | Display |
| S8  | TX functional capacity  | Search modes -<br>Boolean/Phrase | Interface - EBSCOhost<br>Research Databases<br>Search Screen - Advanced<br>Search<br>Database - MEDLINE | Display |

|    |                                                   |                                  |                                                                                                         |         |
|----|---------------------------------------------------|----------------------------------|---------------------------------------------------------------------------------------------------------|---------|
| S7 | TX Cardiorespiratory                              | Search modes -<br>Boolean/Phrase | Interface - EBSCOhost<br>Research Databases<br>Search Screen - Advanced<br>Search<br>Database - MEDLINE | Display |
| S6 | TX physical fitness                               | Search modes -<br>Boolean/Phrase | Interface - EBSCOhost<br>Research Databases<br>Search Screen - Advanced<br>Search<br>Database - MEDLINE | Display |
| S5 | TX Cardiorespiratory test                         | Search modes -<br>Boolean/Phrase | Interface - EBSCOhost<br>Research Databases<br>Search Screen - Advanced<br>Search<br>Database - MEDLINE | Display |
| S4 | TX cardiopulmonary<br>exercise test               | Search modes -<br>Boolean/Phrase | Interface - EBSCOhost<br>Research Databases<br>Search Screen - Advanced<br>Search<br>Database - MEDLINE | Display |
| S3 | MH exercise test                                  | Search modes -<br>Boolean/Phrase | Interface - EBSCOhost<br>Research Databases<br>Search Screen - Advanced<br>Search<br>Database - MEDLINE | Display |
| S2 | MH fibromyalgia OR MH<br>chronic fatigue syndrome | Search modes -<br>Boolean/Phrase | Interface - EBSCOhost<br>Research Databases<br>Search Screen - Advanced<br>Search<br>Database - MEDLINE | Display |
| S1 | TX fibromyalgia                                   | Search modes -<br>Boolean/Phrase | Interface - EBSCOhost<br>Research Databases<br>Search Screen - Advanced<br>Search<br>Database - MEDLINE | Display |
